1

2 **Mycobacterial CarD defines a novel mechanism of response to starvation**  
3 **stress**

4

5 **Xinfeng Li <sup>a, †</sup>, Fang Chen <sup>a, †</sup>, Xiaoyu Liu <sup>a</sup>, Jinfeng Xiao <sup>a</sup>, Binda T. Andongma <sup>a</sup>,**  
6 **Qing Tang <sup>a</sup>, Xiaojian Cao <sup>a</sup>, Shan-Ho Chou <sup>a, b</sup>, Michael Y. Galperin <sup>c</sup>, Jin He <sup>a, \*</sup>**

7

8 <sup>a</sup>State Key Laboratory of Agricultural Microbiology, College of Life Science and Technology,  
9 Huazhong Agricultural University, Wuhan, Hubei 430070, China

10 <sup>b</sup>Institute of Biochemistry and Agricultural Biotechnology Center, National Chung Hsing  
11 University, Taichung 40227, Taiwan

12 <sup>c</sup>National Center for Biotechnology Information, National Library of Medicine, National  
13 Institutes of Health, Bethesda, MD 20894, USA

14 <sup>†</sup>These authors contributed equally to this work.

15 <sup>\*</sup>To whom correspondence may be addressed. Email: [hejin@mail.hzau.edu.cn](mailto:hejin@mail.hzau.edu.cn)

16

17

18 **Abstract**

19 Under starvation conditions, bacteria tend to slow down their translation rate by reducing  
20 rRNA synthesis, but the way they accomplish that may vary in different bacteria. In  
21 *Mycobacterium* species, transcription of rRNA is activated by the RNA polymerase  
22 (RNAP) accessory transcription factor CarD, which interacts directly with RNAP to  
23 stabilize the RNAP-promoter open complex formed on rRNA genes. The functions of CarD  
24 have been extensively studied, but the mechanisms that control its expression remain  
25 obscure. Here, we report that the level of CarD was tightly regulated when mycobacterial  
26 cells switched from nutrient-rich to nutrient-deprived conditions. At the translational level,  
27 an antisense RNA of *carD* (AscarD) was induced in a SigF-dependent manner to bind with  
28 *carD* mRNA and inhibit CarD translation, while at the post-translational level, the residual  
29 intracellular CarD was quickly degraded by the Clp protease. AscarD thus worked  
30 synergistically with Clp protease to maintain CarD at the minimal level to help  
31 mycobacterial cells cope with the nutritional stress. Altogether, our work elucidates the  
32 regulation mode of CarD and delineates a new mechanism for the mycobacterial starvation  
33 response, which is important for the adaptation and persistence of mycobacterial pathogens  
34 in the host environment.

35

## 36 **Introduction**

37 Bacterial starvation response refers to the physiological changes occurring in bacteria  
38 due to the lack of external nutrients during their growth and reproduction (1). Under  
39 starvation conditions, bacterial cells usually reduce the synthesis of rRNA and ribosome  
40 proteins (2, 3). The mechanisms of starvation response that have been elucidated in such  
41 bacteria as *Escherichia coli* and *Bacillus subtilis* work primarily by reducing rRNA  
42 transcription via decreasing the stability of the transcription initiation complex (4, 5).

43 *Mycobacterium* is a widespread genus of Gram-positive bacteria that comprises several  
44 important pathogens, including *Mycobacterium tuberculosis*, the causative agent of  
45 tuberculosis, which kills ~1.5 million people every year. One of the main difficulties in  
46 eliminating *M. tuberculosis* is that it usually responds to various host stresses, such as  
47 nutritional starvation, low oxygen, and low pH, by entering into a dormant state, which  
48 renders the organism extremely resistant to host defenses and antibacterial drugs (6). This  
49 genus also includes non-pathogens, such as *M. smegmatis*, which is widely used as a model  
50 organism for mycobacterial research. At present, the starvation response mechanisms of  
51 mycobacterial cells remain obscure.

52 Mycobacterial RNA polymerase (RNAP) is usually less efficient in forming RNAP-  
53 promoter open complex (RPo) than *E. coli* RNAP on the rRNA genes (7), and the RPo  
54 formed is rather unstable and readily reversible (7, 8). To overcome this deficiency,  
55 mycobacterial cells have evolved two accessory transcription factors, CarD and RbpA, that  
56 help RNAP form a stable RPo (9-11). Both are global transcription factors that interact  
57 directly with RNAP to regulate the transcription of many downstream genes, including  
58 those of rRNA (9, 12, 13). CarD stabilizes mycobacterial RPo via a two-tiered kinetic  
59 mechanism. First, CarD binds to the RNAP-promoter closed complex (RPc) to increase the  
60 rate of DNA opening; then, CarD associates with RPo with a high affinity to prevent the  
61 DNA bubble collapse (7, 8, 10). Although binding of CarD to RNAP tends to increase the  
62 stability of RPo, it may also delay the dissociation of RNAP from the promoter region and  
63 thus hinder transcription progress (11). Therefore, CarD may also inhibit the expression of  
64 certain genes. Whether CarD activates or inhibits expression of a specific target gene  
65 appears to be determined by the kinetics of the initiation complex formation among CarD,

66 RNAP, and the specific promoter (11, 12). CarD was found to be essential for the survival  
67 of mycobacterial cells (14) and weakening the interaction between CarD and RNAP  
68 rendered mycobacterial cells more sensitive to oxidative stress, DNA damage, and the  
69 effect of some antibiotics (15-17). A recent study showed that CarD regulates (either  
70 activates or inhibits) the expression of approximately two-thirds of genes in *M. tuberculosis*  
71 (12). Despite the fact that CarD plays such a critical role in mycobacteria, the mechanisms  
72 that regulate its cellular levels remain largely uncharacterized.

73 It is worth noting that CarD was initially thought to inhibit the transcription of rRNA  
74 genes, and the transcription of *carD* was up-regulated in response to starvation (14).  
75 However, more recently, it was reported that CarD is a transcriptional activator of rRNA  
76 genes (8, 18) and the growth rates of mycobacterial cells positively correlate with the CarD  
77 content (14, 15, 17). Nevertheless, the expression of CarD is still considered to be up-  
78 regulated in response to starvation. If this was the case, the increased CarD would  
79 accelerate rRNA synthesis and mycobacterial cells' growth under the starvation condition,  
80 which seems to contradict the current consensus (19-21). Therefore, it is important to  
81 clarify the regulation of CarD expression under starvation conditions. In the current study,  
82 we found that although *carD* transcript levels were upregulated in response to starvation,  
83 its protein level dramatically decreased. Further, we found that the reduction of CarD  
84 protein level under starvation conditions is a common regulatory mechanism that depends  
85 upon functioning of both antisense RNA and Clp protease. Our research describes the  
86 mechanisms behind the apparent contradiction between CarD mRNA and protein levels  
87 and reveals a new mechanism of mycobacterial response to stress.

88

## 89 **Results**

### 90 **CarD protein level increases under genotoxic stresses but dramatically decreases** 91 **under starvation conditions**

92 CarD is an essential RNAP-interacting protein that regulates the transcription of rRNA  
93 genes and many related genes by stabilizing the RPo. While Stallings and colleagues found  
94 that the *carD* gene is up-regulated in response to starvation and genotoxic stresses in *M.*

95 *smegmatis* strain  $mc^2155$  (14), they only monitored the transcriptional level but not the  
96 translation of *carD*, which may not truly reflect the CarD protein content. Therefore, to  
97 clarify the dynamics of CarD content under the starvation condition and genotoxic stresses,  
98 we examined both the *carD* transcript and CarD protein levels in the  $mc^2155$  strain by qRT-  
99 PCR and Western blot experiments, respectively. As shown in Fig. 1A and B, both *carD*  
100 transcript and CarD protein levels increased under genotoxic stresses triggered by  $H_2O_2$ ,  
101 methyl methanesulphonate (MMS), or ciprofloxacin (CIP), which was consistent with the  
102 previous reports that CarD may be involved in DNA damage repair (14). However,  
103 although the *carD* transcript level increased in response to starvation (Fig. 1A), the CarD  
104 protein level, instead, decreased (marked by an arrow in Fig. 1B). This observation  
105 indicated that CarD is down-regulated, not up-regulated as previously reported (14), under  
106 the starvation condition.

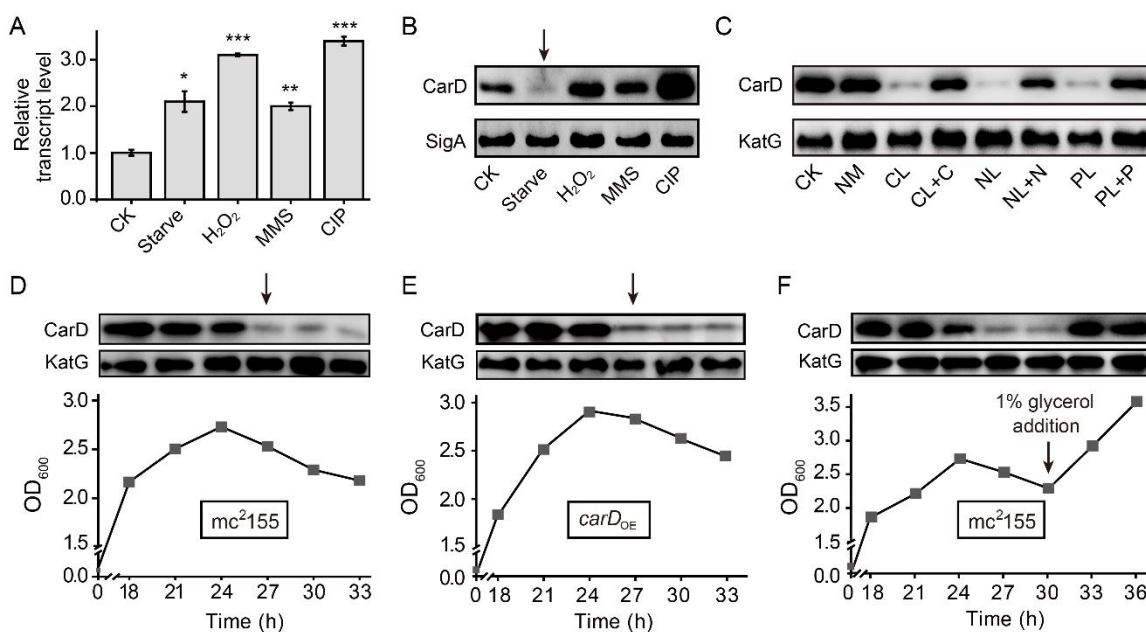

107

108 **Fig. 1. Changes of CarD transcript and protein levels under starvation and genotoxic stress. A and**  
109 **B,** the transcript and protein levels of CarD, respectively, under different stress conditions. CK indicates  
110 the untreated cells of  $mc^2155$ . “Starve” means that  $mc^2155$  cells were first cultured in the 7H9 medium,  
111 and then transferred to phosphate-buffered saline (PBS) for 4 h. For stimulation experiments, 10 mM  
112  $H_2O_2$ , 0.1% methyl methanesulphonate (MMS), and 10 mg/mL of ciprofloxacin (CIP) were used.  
113 Statistical testing was done using the Student's t-test, with \*\*\* indicating p-value <0.001, \*\* indicating  
114 p-value <0.01, and \* indicating p-value <0.05. Error bars indicate standard deviation of three biological

115 replicates. SigA was used as a control in the Western blot experiment. **C**, protein levels of CarD under  
116 distinct starvation conditions. CK indicates the untreated exponential cells; NM indicates the  
117 exponential cells transferred into the normal medium for 4 h; CL, NL, and PL indicate the exponential  
118 cells transferred into carbon-limited, nitrogen-limited, and phosphorus-limited media for 4 h,  
119 respectively; CL+C, NL+N, and PL+P indicate the starved mc<sup>2</sup>155 cultures supplemented with the  
120 corresponding nutrients for 4 h. KatG was used as the control in the Western blot experiments. **D-F**,  
121 CarD protein levels at the different growth stages in mc<sup>2</sup>155 (**D** and **F**), and *carD* over-expressing strain  
122 (*carD*<sub>OE</sub>, panel **E**). The lower part of the chart shows the respective growth curves with the sampling  
123 times.

124

125 To investigate whether the decline in the CarD level is due to the lack of a specific  
126 nutrient or to a general response to starvation stress, we investigated the changes in CarD  
127 levels under carbon-, nitrogen-, and phosphorus-starvation conditions. We first cultured  
128 mc<sup>2</sup>155 cells to mid-exponential phase (MEP), harvested the cells, and then transferred  
129 these cells to the normal medium (NM), carbon-limited (CL), nitrogen-limited (NL), and  
130 phosphorus-limited (PL) medium, followed by detecting the respective levels of CarD. The  
131 levels of CarD were significantly reduced under all the starvation conditions compared  
132 with the CarD level in the normal medium (Fig. 1C). When the nutrient-limited media were  
133 supplemented with the corresponding nutrients, CarD returned to normal levels.

134 Since the mycobacterial cells in the stationary phase are in the state of nutritional  
135 starvation (22), we also measured the CarD protein levels at different growth periods of  
136 strain mc<sup>2</sup>155. As shown in Fig. 1D, the CarD level remained relatively constant in the  
137 exponential phase but dropped sharply in the early stationary phase (marked by an arrow  
138 in Fig. 1D), which is consistent with the above starvation experiments. To further verify  
139 this result, we constructed a *carD* over-expressing strain (*carD*<sub>OE</sub>) and measured CarD  
140 protein levels at different growth periods. Interestingly, despite *carD* overexpression, the  
141 CarD protein level still decreased rapidly when the mycobacterial cells entered the  
142 stationary phase (marked by an arrow in Fig. 1E). Since the carbon source in the culture  
143 medium was likely depleted when the mycobacterial cells entered the stationary phase (22),  
144 we speculated that the decrease in the CarD protein level could be caused by carbon

145 starvation. To verify this hypothesis, we added 1% glycerol (glycerol is the main carbon  
146 source under normal culture conditions of *M. smegmatis*) to the mc<sup>2</sup>155 culture in the  
147 stationary phase and measured the CarD protein level 3 and 6 hours after that. As shown  
148 in Fig. 1F, the CarD level rapidly increased after the glycerol addition, and the mc<sup>2</sup>155  
149 cells resumed normal growth. Considering that CarD activates the transcription of rRNA  
150 (8, 18), and that cells need to reduce rRNA levels in response to starvation (4), we believe  
151 that the reduction in the CarD level under starvation conditions may be an adaptive  
152 response of mycobacterial cells. Yet, when nutrients became available, CarD quickly  
153 returned to its normal level to allow the cells to resume growth.

#### 154 **CarD levels are dramatically decreased in *M. bovis* BCG and *M. tuberculosis* under** 155 **host-like stress conditions**

156 To investigate whether the rapid reduction of CarD levels under starvation conditions  
157 also happens in other mycobacterial species, we carried out starvation experiments in two  
158 other mycobacteria, *M. bovis* BCG and *M. tuberculosis* H37Ra. The results are consistent  
159 with those in *M. smegmatis*, that is, CarD levels were all significantly reduced in response  
160 to carbon-, nitrogen-, and phosphorus-starvation conditions (Fig. 2A, B). When nutrient-  
161 limited cultures were supplemented with the corresponding nutrients, CarD returned to the  
162 normal levels. In addition, we also measured the CarD levels at different growth phases of  
163 the two strains. As shown in Fig. 2C and D, CarD levels were rapidly decreased when BCG  
164 and H37Ra cells entered the stationary phase, which is also consistent with the results in  
165 *M. smegmatis*. The above results indicate that the rapid reduction of the CarD level in  
166 response to starvation is a common phenomenon in mycobacteria, and regulating CarD  
167 content to cope with nutritional starvation is a conserved mechanism for the mycobacterial  
168 adaptive response.

169 It is important to note that after infecting the host, pathogenic mycobacteria not only  
170 suffer from nutritional deprivation but are also exposed to hypoxic and acidic conditions.  
171 Therefore, to explore whether CarD plays a role in the adaptation of mycobacterial cells to  
172 the host environment, we measured CarD levels under these conditions. As shown in Fig.  
173 2E, CarD levels were significantly decreased when the mycobacterial cells were transferred



174 to the low pH media. For the hypoxic conditions, similarly, CarD levels were also reduced  
175 when mycobacterial cells were under hypoxic stress and returned to normal after the  
176 cultures were re-aerated. (Fig. 2F and Fig. S1). These results suggest that mycobacterial  
177 cells reduce CarD levels in response to host stresses to slow down their translation and  
178 metabolic rates, which likely contributes to the adaptation of pathogenic mycobacteria to  
179 the hostile environment.

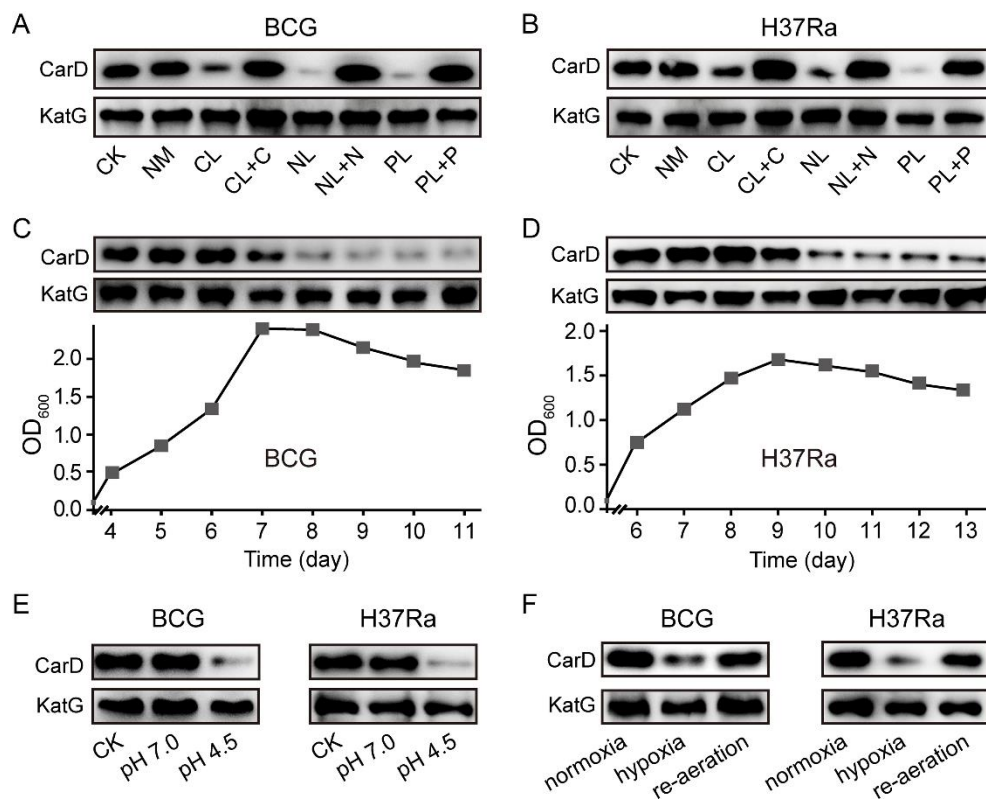

180

181 **Fig. 2. Changes of CarD levels in *M. bovis* BCG and *M. tuberculosis* H37Ra under host-like stress**  
182 **conditions. A and B, the protein levels of CarD in BCG and H37Ra strains, respectively, under distinct**  
183 **starvation conditions. C and D, CarD protein levels at the different growth stages of BCG and H37Ra,**  
184 **respectively. E, CarD protein levels in BCG and H37Ra under different pH conditions. F, CarD protein**  
185 **levels in BCG and H37Ra under different oxygen availability conditions.**

186

### 187 **Clp protease degrades CarD under starvation conditions**

188 Since the CarD level decreased rapidly under nutritional starvation, hypoxic, and acidic  
189 conditions, we speculated that CarD might be degraded by a certain protease. To check this



190 hypothesis, we carried out an *in vitro* CarD degradation experiment. We overexpressed the  
191 CarD protein in mc<sup>2</sup>155 cells, purified it, and incubated the purified CarD with the total  
192 protein extract of mc<sup>2</sup>155 cells to check the degradation of CarD. The result showed that  
193 CarD protein level decreases substantially when incubated with an untreated total protein  
194 extract but no change is observed when CarD is incubated with the boiled protein extract  
195 (Fig. S2). This indicates that the reduction of the CarD level under starvation is due to its  
196 degradation by a certain protease, which was denatured after boiling and lost the activity  
197 to degrade CarD. Moreover, CarD could still be degraded after adding EDTA to the  
198 reaction system, suggesting that the CarD-degrading protease was not dependent on metal  
199 ions.

200 Clp protease is a special energy-dependent protease that regulates the response to various  
201 stresses. Moreover, previous reports indicated that Clp protease can participate in the rapid  
202 degradation of specific proteins under starvation (23, 24). Also, through quantitative  
203 proteomics research, Raju et al. found that the CarD protein level in the *clpP2* conditional  
204 deletion mutant was approximately two times higher than in the wild-type strain of *M.*  
205 *tuberculosis* (25). However, that study only measured CarD in the exponential phase, not  
206 in the stationary phase. Therefore, it was unclear whether Clp protease mediates the rapid  
207 degradation of CarD in the stationary phase. To address this question, we constructed a  
208 *clpP2* conditional mutant (*clpP2CM*) (Methods, and Fig. S3) through the CRISPR/Cpf1-  
209 mediated gene editing strategy (26), in which *clpP2* could be expressed normally only upon  
210 addition of 50 ng/mL anhydrotetracycline (ATc), but could not do so when ATc was absent.  
211 Then, we measured the CarD protein levels of the *clpP2CM* mutant and the control strain  
212 (Ms/pRH2502-*clpP2*, Fig. S3) at different growth stages. The results showed that CarD  
213 was rapidly degraded when the control cells entered the stationary phase, regardless of the  
214 presence of ATc (Fig. 3A, B). In the *clpP2CM* strain, CarD was also rapidly degraded in  
215 the stationary phase when ATc was added to induce the *clpP2* expression (Fig. 3C) but  
216 persisted when *clpP2* was not induced (Fig. 3D). These results indicate that Clp protease  
217 was responsible for the rapid degradation of CarD in the stationary phase.

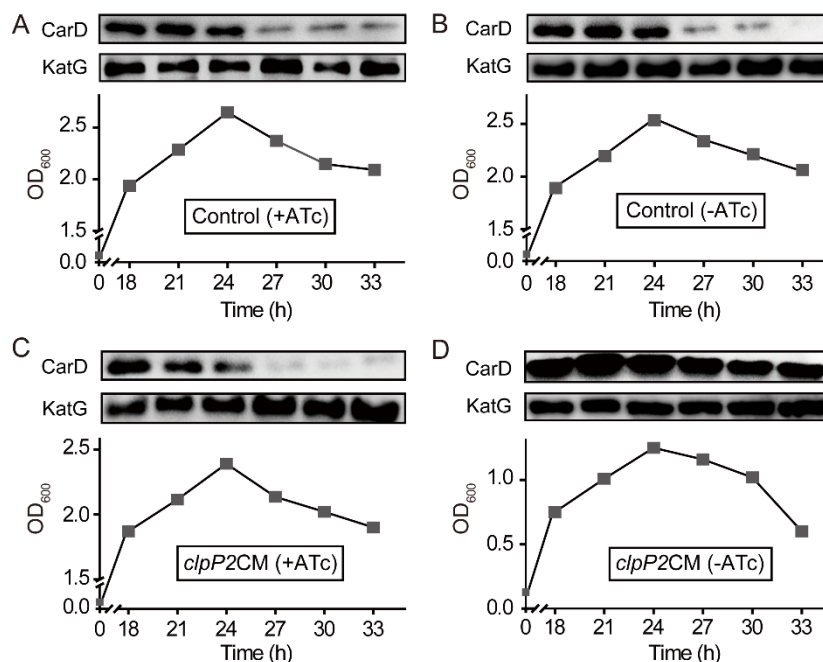

218

219 **Fig. 3. Clp protease is responsible for CarD degradation in stationary phase.** A and B, the  
220 intracellular CarD levels at different time points of the ATc-induced and ATc-uninduced control strain  
221 cells (Ms/pRH2502-*clpP2*), respectively. C and D, the CarD levels at different time points of the ATc-  
222 induced and ATc-uninduced *clpP2CM* (*clpP2* conditional mutant) cells, respectively. KatG was used  
223 as the control in the Western blot experiments.

224 To investigate whether Clp protease is also required for degrading intracellular CarD  
225 under starvation conditions, we carried out a series of starvation experiments on *clpP2CM*  
226 cells harvested from the MEP. The results showed that CarD was rapidly degraded when  
227 the ATc-induced *clpP2CM* cells were starved in PBS for 4 h, while in the ATc-uninduced  
228 *clpP2CM* cells CarD was not degraded (Fig. S4A). To further confirm this result, we  
229 carried out *in vitro* CarD degradation experiments by incubating the purified CarD protein  
230 with the total protein extracts of ATc-induced and ATc-uninduced *clpP2CM* cells,  
231 respectively, and measured the extent of CarD degradation. The results showed that the  
232 untreated total proteins extracted from ATc-induced *clpP2CM* cells could degrade the  
233 purified CarD (Fig. S4B), while the protein extracted from ATc-uninduced *clpP2CM* cells  
234 could not (Fig. S4C). This result was consistent with the experimental data described above,  
235 allowing us to conclude that Clp protease was responsible for the degradation of CarD  
236 under starvation conditions.

### 237 **Starvation induces the transcription of antisense RNA of *carD***

238 Next, we wanted to know whether the intracellular CarD content is subject to other types  
239 of regulation other than degradation by Clp protease. After mining our previously  
240 published RNA-seq data of strain mc<sup>2</sup>155 (27), we identified an antisense RNA transcribed  
241 from the complementary strand of the *carD-ispD* operon. As shown in Fig. 4A, this  
242 antisense RNA (named AscarD) is partially complementary to the coding region of *ispD*  
243 but fully complementary to the coding region of *carD*. The RNA-seq data also showed that  
244 AscarD was specifically induced in the MSP (Fig. 4A). To confirm this phenomenon, we  
245 examined the transcriptional level of AscarD at different growth phases by RT-PCR, and  
246 the results showed that AscarD level during the MSP was significantly higher than that in  
247 the MEP (Fig. S5), which is consistent with the RNA-seq data.

248 To better characterize AscarD, we determined its transcriptional start site (TSS) by  
249 carrying out the 5'-RACE (5'-Rapid Amplification of cDNA Ends) experiment (Fig. 4B).  
250 The TSS identified by 5'-RACE was consistent with that revealed by the RNA-seq data.  
251 We also discovered potential SigF-recognized -10 and -35 motifs upstream of the identified  
252 TSS (Fig. 4C). SigF is an alternative sigma factor that is active in the stationary phase,  
253 which is consistent with the transcriptional pattern of AscarD, suggesting that the  
254 transcription of *ascarD* is controlled by SigF. To verify this hypothesis, we examined the  
255 transcriptional level of *ascarD* in a *sigF* mutant ( $\Delta sigF$ ). As shown in Fig. 4D, only a very  
256 low AscarD transcriptional level could be detected in the  $\Delta sigF$  strain in the MEP, and  
257 transition to the MSP could not induce it either. These data indicate that the expression of  
258 *ascarD* is regulated by SigF.

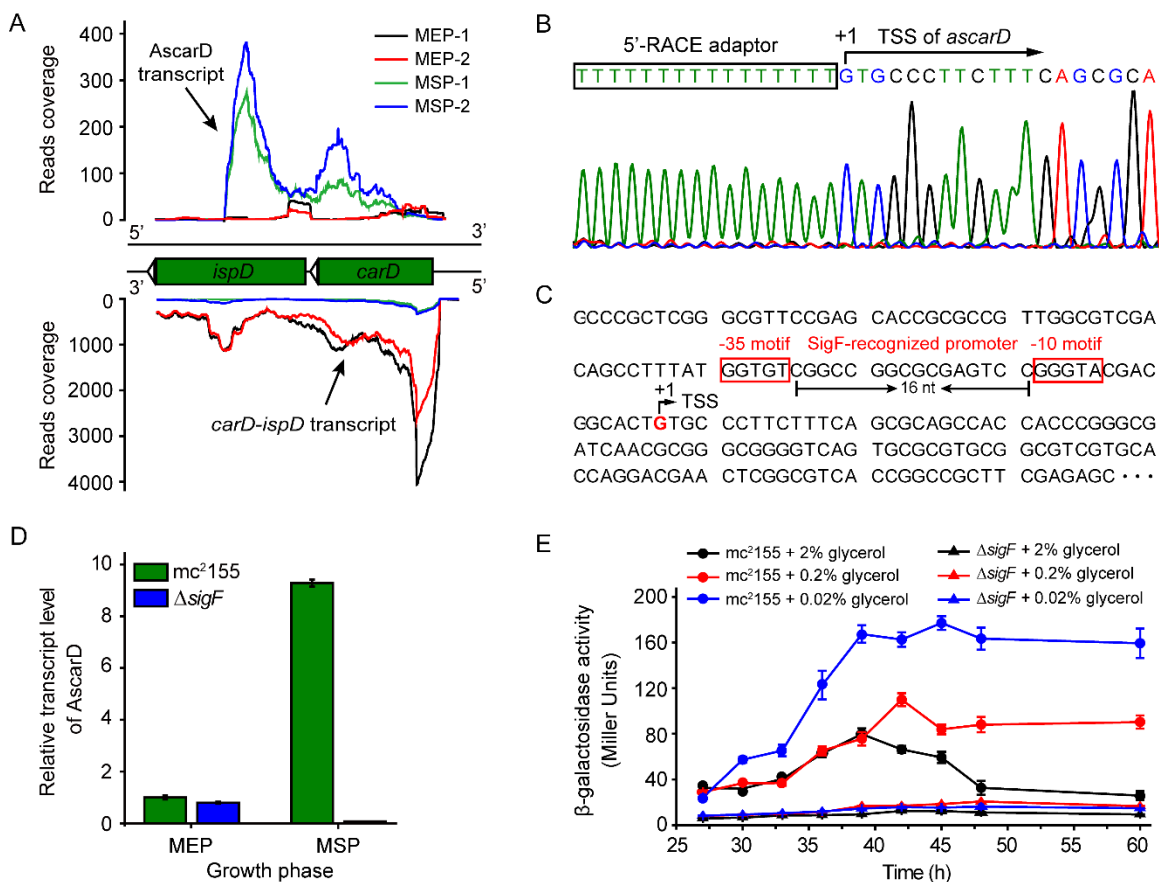

259

260 **Fig. 4. Identification and characterization of AscarD.** **A**, transcriptional landscapes of *carD-ispD*  
 261 transcript and AscarD. Red and black lines represent exponential-phase cells, blue and green lines are  
 262 from stationary-phase cells. Extensions of -1 and -2 represent two biological replicates. **B**, mapping of  
 263 the transcriptional start site (TSS) of AscarD. The lower four-color chromatogram shows the results of  
 264 Sanger sequencing, the corresponding DNA sequence is displayed on the upper layer. The 5'-RACE  
 265 adaptor sequence is framed by a black rectangle, and TSS is indicated by a black arrow. **C**, potential  
 266 SigF-recognized -10 and -35 motifs (GGTGT-N<sub>16</sub>-GGGTA) upstream of the identified TSS are  
 267 indicated with red rectangles. **D**, transcriptional levels of AscarD in mc<sup>2</sup>155 and  $\Delta$ *sigF* strains as  
 268 measured by qRT-PCR. **E**, promoter activities of *ascarD* in mc<sup>2</sup>155 and  $\Delta$ *sigF* strains carrying a  $\beta$ -  
 269 galactosidase-encoding reporter plasmid. Error bars indicate the standard deviation of three biological  
 270 replicates.

271

272 Further, since *ascarD* was highly expressed during the stationary phase, we speculated  
 273 that transcription of *ascarD* could be also subject to carbon starvation. To verify this idea,

274 we carried out *lacZ* reporter assays to examine the *ascarD* promoter activity under different  
275 carbon source (glycerol) concentrations. As shown in Fig. 4E, the *ascarD* promoter activity  
276 gradually increased as the glycerol concentrations decreased. This indicates that *ascarD*  
277 could indeed be induced under carbon starvation conditions; however, in the  $\Delta sigF$  strain,  
278 the expression of *ascarD* did not respond to the glycerol concentration (Fig. 4E). This  
279 indicates that the response of *ascarD* to low carbon requires the presence of SigF, which  
280 is consistent with the above results. Thus, we confirm that the transcription of *ascarD* was  
281 highly induced in response to starvation in a SigF-dependent manner.

### 282 **AscarD inhibits biosynthesis of CarD protein**

283 Expression of AscarD was highly induced in response to starvation, while the CarD  
284 protein level was sharply reduced, suggesting that AscarD could be involved in regulating  
285 *carD* expression. To clarify this issue, we constructed the control plasmid P<sub>PU</sub> as well as  
286 the target plasmid P<sub>PUC</sub> (Methods), and carried out a series of *lacZ* reporter assays (Fig.  
287 5A). AscarD was expected to target the transcript obtained from the P<sub>PUC</sub> plasmid but not  
288 the transcript from the P<sub>PU</sub> plasmid. We then transformed the two plasmids into the *ascarD*  
289 overexpression strain (*ascarD*<sub>OE</sub>), *ascarD* knockdown strain (*ascarD*<sub>KD</sub>), and the control  
290 strain (mc<sup>2</sup>155 with pMV261 empty vector), respectively, and examined their  $\beta$ -  
291 galactosidase activities. The  $\beta$ -galactosidase activities among the three strains transferred  
292 with the control plasmid P<sub>PU</sub> did not differ much (Fig. 5B). However, for those transferred  
293 with target plasmid P<sub>PUC</sub>, the  $\beta$ -galactosidase activity was significantly reduced in the  
294 *ascarD*<sub>OE</sub> strain, while significantly increased in the *ascarD*<sub>KD</sub> strain compared to the  
295 control strain (Fig. 5B). These results indicate that AscarD inhibited the expression of the  
296 *carD-lacZ* transcript by targeting the *carD* region.

297 Additionally, we modified the P<sub>PUC</sub> plasmid by fusing the original sequence (P<sub>*ascarD*</sub>) and  
298 the mutated sequence (P<sub>*ascarD*M</sub>) of the *ascarD* promoter region upstream of *lacZ* to  
299 construct the P<sub>PUCP</sub> and P<sub>PUCP\*</sub> plasmids, respectively (Fig. 5C). This type of construct can  
300 reflect the native interaction between the AscarD and *carD* transcripts. As shown in Fig.  
301 5D, mycobacterial cells transformed with the P<sub>PUCP\*</sub> plasmid exhibited higher  $\beta$ -  
302 galactosidase activity than those with the P<sub>PUCP</sub> plasmid. This result indicates that the

303 mutated *ascarD* promoter failed to initiate the AscarD transcription and therefore could  
 304 not suppress the expression of the *carD-lacZ* transcript. Based on the above *lacZ* reporter  
 305 assay data, we conclude that AscarD negatively regulates the expression of *carD*.

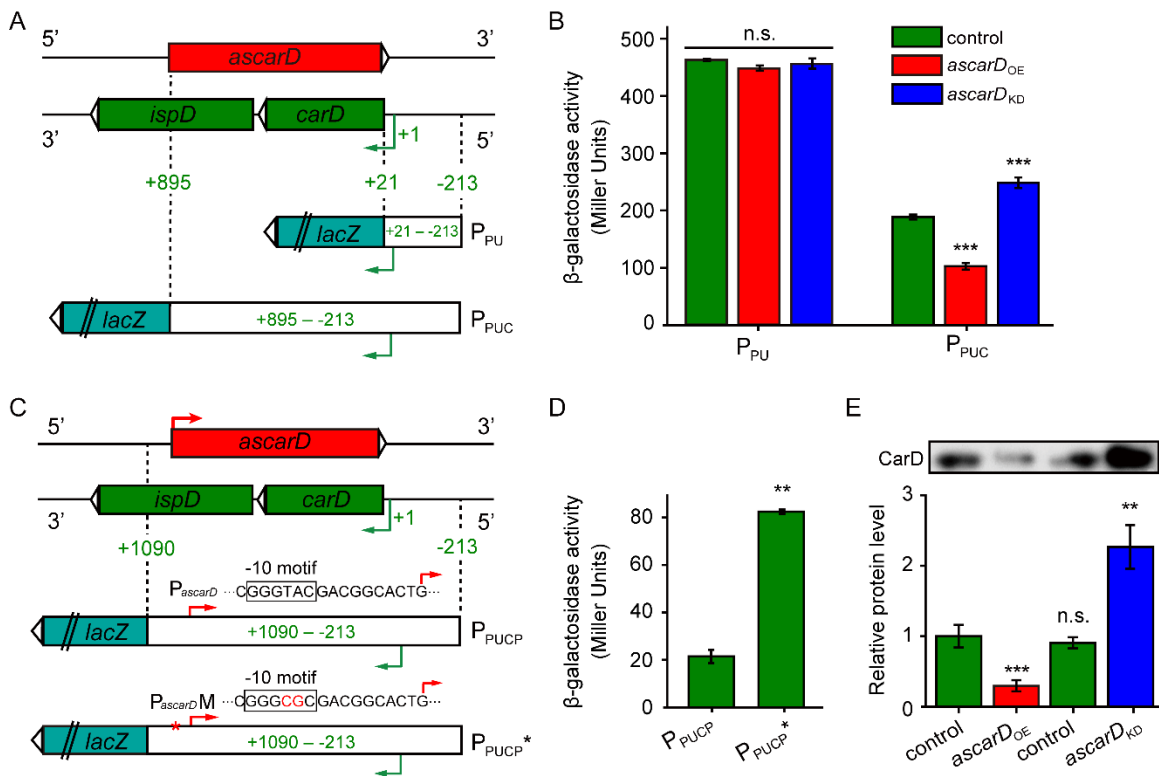

306

307 **Fig. 5. AscarD negatively regulates *carD*.** A and C, a schematic diagram of *P<sub>PU</sub>*, *P<sub>PUC</sub>*, *P<sub>PUCP</sub>*, and  
 308 *P<sub>PUCP\*</sub>* plasmid construction (see a detailed description in Methods). B,  $\beta$ -galactosidase activities of  
 309 different strains transformed with *P<sub>PU</sub>* or *P<sub>PUC</sub>* plasmid. D,  $\beta$ -galactosidase activities of mc<sup>2</sup>155 strain  
 310 transformed with *P<sub>PUCP</sub>* and *P<sub>PUCP\*</sub>* plasmid. E, CarD protein levels in different strains. Mycobacterial  
 311 cells were harvested at the MSP. The upper part shows the Western blot with CarD levels, the histogram  
 312 below it shows the quantitative statistics of Western blot results (Error bars indicate standard deviation  
 313 of three biological replicates).

314

315 Further, we examined the effect of AscarD content on the CarD protein levels in strains  
 316 with different AscarD levels. As shown in Fig. 5E, compared to the control strain, the CarD  
 317 level in the *ascarD<sub>OE</sub>* strain was reduced, while in the *ascarD<sub>KD</sub>* strain it was significantly  
 318 increased. This result indicates that AscarD inhibits the synthesis of CarD, which is  
 319 consistent with the *lacZ* reporter assay data described above. It is important to point out

320 that the inhibitory effect of antisense RNA on target genes can occur at the post-  
321 transcriptional level (reducing transcript stability) and/or the translational level (inhibiting  
322 the transcript translation) (28). To determine the inhibition mode, we measured the  
323 transcript level of *carD* in the *ascarD*<sub>OE</sub> strain. The *carD* transcript levels were  
324 significantly higher in the *ascarD*<sub>OE</sub> strain than those in the control strain (Fig. S6),  
325 illustrating that overexpressed AscarD increases, rather than decreases, the stability of  
326 *carD* transcripts. Since AscarD only reduces the CarD protein level, but not the transcript  
327 level, we believe that AscarD inhibits *carD* expression at the translational level.

328

## 329 **Discussion**

330 In this paper, we present an in-depth study on the regulation of CarD expression and  
331 demonstrate that CarD is synergistically regulated by both AscarD antisense RNA and Clp  
332 protease under starvation conditions. Based on these results, along with those published by  
333 others, we propose a new mechanism for mycobacterial adaption to the starvation  
334 conditions, namely, that mycobacterial cells adjust their transcriptional and translational  
335 rates by regulating the CarD levels in response to the environmental conditions (Fig. 6).  
336 Under abundant nutrition, mycobacterial cells use CarD to stabilize RPo (7-9, 29),  
337 promoting the transcription of rRNA and other related genes (9, 16, 18) to ensure vigorous  
338 cell growth (Fig. 6A). However, when external nutrition gets scarce, SigF-regulated  
339 expression of AscarD is induced and it hybridizes with *carD* mRNA to prevent the  
340 translation of CarD protein (Fig. 4 and 5). Meanwhile, the residual intracellular CarD  
341 protein is rapidly degraded by Clp protease to keep CarD at a very low level (Fig. 1, 2, 3),  
342 which potentially reduces the stability of RPo and diminishes the synthesis of rRNA; these  
343 processes combine to slow down the rate of transcription and translation of mycobacterial  
344 cells (Fig. 6B). When nutrients are available, AscarD transcription is inhibited and *carD*  
345 mRNA gets translated to resume the normal CarD level and ensure the re-growth of  
346 mycobacterial cells (Fig. 1F). Overall, these findings contribute to a better understanding  
347 of the mechanisms of mycobacterial adaptation to starvation and provide certain clues that  
348 might help in the treatment of tuberculosis.



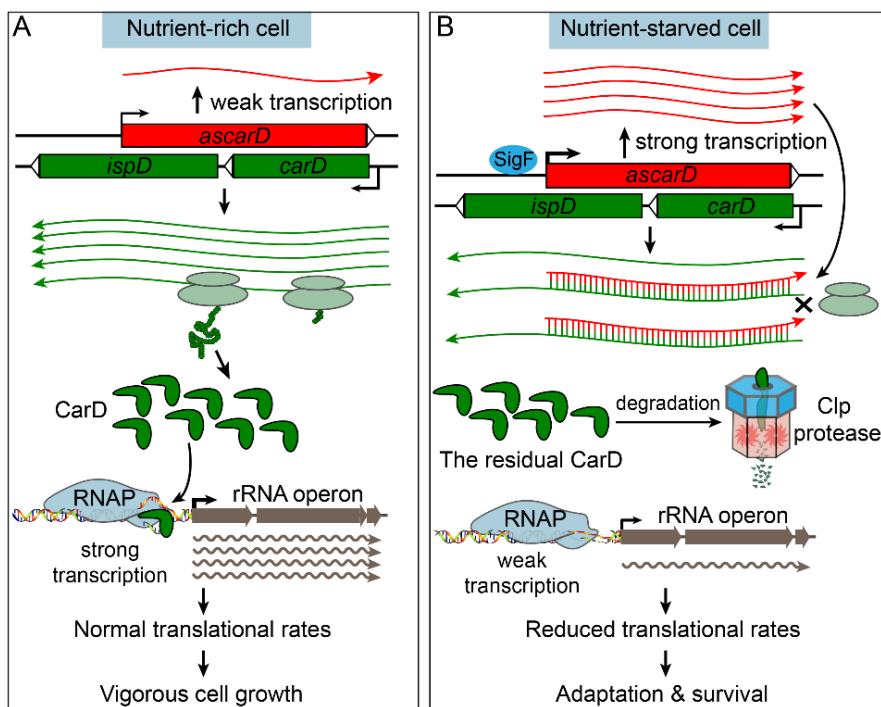

349

350 **Fig. 6. AscarD and Clp protease work synergistically to regulate CarD-mediated starvation**  
351 **response. A and B represent the nutrient-rich and nutrient-starved cells, respectively.**

352

353 **Mycobacterial CarD defines a distinct adaptive response mechanism**

354 Before this work, the best-known starvation response mechanism in *Mycobacterium* was  
355 the stringent response mediated by (p)ppGpp. Yet, its detailed mechanism is still not  
356 entirely clear today, although it is considered similar to the well-characterized stringent  
357 response mechanisms reported in *E. coli* and *B. subtilis* (30-32). In *E. coli*, (p)ppGpp is  
358 synthesized in large quantities in response to starvation and directly interacts with RNAP  
359 to destabilize the RPo formed on rRNA genes and consequently reduces the rRNA  
360 synthesis (4). However, (p)ppGpp in *B. subtilis* does not directly interact with RNAP but  
361 instead decreases the intracellular GTP content to destabilize the RPo formed on the genes  
362 that start from guanine, such as the rRNA genes (33, 34). In mycobacteria, the exact effect  
363 and role of ppGpp on rRNA transcription is unclear, but (p)ppGpp likely inhibits the  
364 transcription of mycobacterial rRNA by affecting the stability of RPo (32), which is similar  
365 to the CarD-mediated starvation response. Of course, these two mechanisms also have their  
366 unique features. First, (p)ppGpp reduces the stability of RPo (30, 35), while CarD enhances

16

367 its stability (7-9, 29); second, (p)ppGpp is rapidly synthesized in response to starvation,  
368 while CarD is quickly degraded under starvation conditions. Despite the differences  
369 between the two mechanisms, they basically work in the same way and ultimately help the  
370 mycobacterial cells adapt to starvation by reducing the rRNA synthesis. It should be noted  
371 that Stallings and colleagues previously reported that CarD is required for stringent  
372 response in *M. smegmatis* (14). However, our data showed that CarD is rapidly degraded  
373 under starvation conditions where stringent response usually occurs. This may seem to  
374 contradict the previous study, but since both CarD and (p)ppGpp interact with RNAP (4,  
375 14), the two molecules might have complex effects on RNAP that remain to be  
376 disentangled.

377 In addition, our study found that mycobacterial cells reduce CarD levels in response to  
378 hypoxic condition. By analyzing the RNA-seq data for *M. tuberculosis* (12), we found that  
379 18 of the top 20 up-regulated genes (Table S1) in CarD<sup>K125A</sup> strain (a mutant with predicted  
380 weakened affinity of CarD to DNA) belong to the previously identified dormancy regulon  
381 (36), and 31 out of 48 dormancy regulon genes are significantly up-regulated. These data  
382 indicate that CarD represses the expression of dormancy regulon genes, and the reduction  
383 of CarD level during starvation or hypoxia may derepress these genes and facilitate  
384 mycobacterial dormancy. Since pathogenic mycobacteria usually live in a nutrient-  
385 deprived and hypoxic environment after infecting the host, we believe that CarD plays an  
386 important role in the dormancy and persistence of pathogenic mycobacteria in the host cells.  
387 Taken together, the CarD-mediated mycobacterial adaptive response mechanism is multi-  
388 faceted; reduction of CarD not only down-regulates the transcription of rRNA to help  
389 mycobacterial cells adapt to nutritional starvation, but also enhances the expression of  
390 dormancy regulon genes to help pathogenic mycobacteria entering into a dormant state.

### 391 **The mechanism of specific degradation of CarD under starvation condition**

392 The rapid decrease of CarD protein levels under starvation was caused by its degradation  
393 by Clp protease. But after analyzing the transcriptomics (27) and proteomics (37) data, we  
394 found that Clp protease-related genes are expressed normally in the exponential phase.  
395 Therefore, we speculate that the intracellular CarD in the exponential phase may be  
396 protected by a certain complex, which is no longer in force after the mycobacterial cells

397 entered the stationary phase. It is worth noting that Garner et al. previous research  
398 suggested that CarD-RNAP interaction protects CarD from proteolytic degradation in *M.*  
399 *tuberculosis* (15). Therefore, we speculate that it maybe RNAP that protect CarD in the  
400 exponential phase. After entering the stationary phase, CarD may be detached from RNAP  
401 through unknown mechanisms and be rapidly degraded by Clp protease. Of course, there  
402 may be other reasons why CarD in the exponential phase was not degraded. First, besides  
403 Clp protease, degradation of CarD may require an adaptor protein. For example, in  
404 *Caulobacter crescentus*, CpdR directly controls PdeA degradation by acting as a  
405 phosphorylation-dependent adaptor protein for the ClpXP protease (38). We speculate that  
406 there is possibly an adaptor protein that recognizes CarD under the starvation condition  
407 and delivers it to the Clp protease for degradation. Second, Clp protease may only degrade  
408 the modified (or unmodified) CarD. For example, certain protein substrates in *B. subtilis*  
409 are degraded by Clp protease only after their arginine residues are phosphorylated (39).  
410 CarD might undergo a similar structural modification (or un-modification) under the  
411 starvation condition, which is specifically recognized and degraded by Clp protease.

#### 412 **The regulation of *carD* by AscarD**

413 The regulatory mechanism of AscarD is somewhat similar to that of *E. coli* antisense  
414 RNA GadY, which is also induced during stationary phase and enhances the stability of  
415 the target mRNA (40). GadY binding to the intergenic region of the bicistronic transcript  
416 *gadX-gadW* induces cleavage of this transcript by endoribonucleases, mainly RNase III,  
417 resulting in two stable transcripts *gadX* and *gadW* (41, 42). AscarD likely works similarly  
418 to GadY since the base paring of AscarD to the *carD-ispD* transcript also covers its  
419 intergenic region. Moreover, mycobacteria possess a variety of endoribonucleases,  
420 including RNase III, which may direct *carD-ispD* processing. However, AscarD and GadY  
421 do differ in some respects. GadY is short (105 nt processed to 90- and 59-nt forms) and  
422 only complementary to the intergenic region of *gadX-gadW*, while AscarD is relatively  
423 long (~800 nt) and complementary to the *carD/ispD* coding region. Besides, GadY  
424 increases the protein yield of GadX, while AscarD reduces the protein yield of CarD. We  
425 speculate that the inhibitory effect of AscarD on CarD protein synthesis may be due to the

426 complete base pairing between AscarD and *carD* mRNA, which probably causes a block  
427 in ribosome binding. Future studies should clarify the exact mechanism by how AscarD  
428 affects CarD's stability and translation and help us better understand the biological  
429 significance of AscarD.

### 430 **The effects of CarD regulation on RbpA expression**

431 In contrast to CarD, the protein levels of RbpA, another RNAP accessory transcription  
432 factor in mycobacteria, increase during the stationary phase (43). This helps the  
433 mycobacterial cells to maintain the (slow) growth in the stationary phase, as they still need  
434 a certain number of functioning ribosomes and a certain (low) level of rRNA synthesis to  
435 survive. RbpA exhibits a specific interaction with  $\sigma^B$  (44) to potently regulate  $\sigma^B$ -dependent  
436 genes.  $\sigma^B$  is induced in the stationary phase (45) and participates substantially in the  
437 stationary-phase survival and stress response of mycobacterial cells (46, 47). Therefore,  
438 we believe that the increase of RbpA amount in the stationary phase is beneficial as it  
439 elevates the expression of  $\sigma^B$ -dependent stress response genes and helps mycobacterial  
440 cells better adapt to adverse environments.

441

## 442 **Materials and Methods**

### 443 **Bacterial strains and growth conditions**

444 *E. coli* strains were cultivated in lysogeny broth (LB) medium at 37°C. *M. smegmatis*  
445 mc<sup>2</sup>155 wild-type strain (48) and its derivatives were grown at 37°C in Middlebrook 7H9  
446 medium supplemented with 0.5% (v/v) glycerol and 0.05% (v/v) Tween 80, or on  
447 Middlebrook 7H10 agar supplemented with 0.5% (v/v) glycerol. *M. bovis* BCG and *M.*  
448 *tuberculosis* H37Ra strains (49) were grown at 37°C in 7H9 medium supplemented with  
449 0.5% glycerol, 0.05% Tween 80 and 10% OADC (oleic acid, albumin, dextrose, and  
450 catalase), or on Middlebrook 7H11 agar supplemented with 0.5% glycerol and 10% OADC.  
451 When required, antibiotics were added at the following concentrations: kanamycin (Kan),  
452 25 µg/mL; hygromycin (Hyg), 50 µg/mL; streptomycin (Str), 10 µg/mL.

453 Hartmans-de Bont (HDB) minimal medium, prepared according to reference (22), was  
454 used for starvation experiments. Briefly, 1 L of HDB medium contained: 10 mg of EDTA,  
455 100 mg of  $\text{MgCl}_2 \cdot 6\text{H}_2\text{O}$ , 1 mg of  $\text{CaCl}_2 \cdot 2\text{H}_2\text{O}$ , 0.2 mg of  $\text{NaMoO}_4 \cdot 2\text{H}_2\text{O}$ , 0.4 mg of  
456  $\text{CoCl}_2 \cdot 6\text{H}_2\text{O}$ , 1 mg of  $\text{MnCl}_2 \cdot 2\text{H}_2\text{O}$ , 2 mg of  $\text{ZnSO}_4 \cdot 7\text{H}_2\text{O}$ , 5 mg of  $\text{FeSO}_4 \cdot 7\text{H}_2\text{O}$ , 0.2 mg  
457 of  $\text{CuSO}_4 \cdot 5\text{H}_2\text{O}$ , 1.55 g of  $\text{K}_2\text{HPO}_4$ , 0.85 g of  $\text{NaH}_2\text{PO}_4$ , 2.0 g of  $(\text{NH}_4)_2\text{SO}_4$ , 0.2% glycerol  
458 (v/v), and 0.05% Tween 80 (v/v). For the carbon starvation experiment, glycerol was  
459 removed; for the nitrogen starvation experiment,  $(\text{NH}_4)_2\text{SO}_4$  was removed; for the  
460 phosphorus starvation experiment, both  $\text{K}_2\text{HPO}_4$  and  $\text{NaH}_2\text{PO}_4$  were removed, while 50  
461 mM 3-(N-morpholino) propanesulfonic acid (MOPS) was added to replace lost buffering  
462 capacity.

### 463 **Stimulation and starvation experiments**

464 Mycobacterial cells were first grown to mid-exponential phase (MEP) in the normal 7H9  
465 medium. For genotoxic reagent stimulation experiments, 10 mM  $\text{H}_2\text{O}_2$ , 0.1% methyl  
466 methanesulphonate (MMS), and 10 mg/mL of ciprofloxacin (CIP) were separately added  
467 to the MEP mc<sup>2</sup>155 culture, and maintained in roller bottle culture for additional 4 h. For  
468 the PBS starvation experiment, the MEP mc<sup>2</sup>155 cells were harvested, resuspended in PBS  
469 supplemented with 0.05% Tween 80, and maintained in roller bottle culture for 4 h. For  
470 the carbon-, nitrogen-, and phosphorus-starvation experiments, harvested MEP cells were  
471 resuspended in the HDB medium with carbon, nitrogen, or phosphorus removed,  
472 respectively, and maintained in roller bottle culture for 4 h for the mc<sup>2</sup>155 cells, or 24 h for  
473 the BCG and H37Ra cells. For the nutrient supplemented experiments, the above-  
474 mentioned starved cultures were supplemented with the corresponding nutrients and  
475 maintained in roller bottle culture for additional 4 h for the mc<sup>2</sup>155 cells, or 24 h for the  
476 BCG and H37Ra cells. For the acid stimulation experiments, the harvested MEP cells were  
477 resuspended in the HDB medium with low pH value (pH 4.5) and maintained in roller  
478 bottle culture for 4 h for the mc<sup>2</sup>155 cells, or 24 h for the BCG and H37Ra cells.

479 For anaerobic experiments, the modified Wayne model (50) were used. Briefly, 150 mL  
480 standard serum bottles containing 100 mL of 7H9 medium were used, in which methylene  
481 blue was added to the final concentration of 2  $\mu\text{g}/\text{mL}$  to indicate oxygen content. The

482 harvested MEP cells were re-inoculated into the above serum bottles to make the final  
483 OD<sub>600</sub> of 0.02. Then, the serum bottles were sealed with butyl rubber stoppers, closed  
484 tightly with screw-caps, and incubated at 37°C with shaking. The mc<sup>2</sup>155 cells were  
485 harvested 10 h after the blue color disappeared completely, and the BCG and H37Ra cells  
486 were harvested 48 h after the blue color completely disappeared. For the re-aeration  
487 experiments, the above-mentioned anaerobic cultures were transferred to roller bottles and  
488 harvested after the mycobacterial cells regrow.

#### 489 **RNA isolation, reverse transcription and qRT-PCR**

490 Total RNA was extracted by TRIzol method as described previously (27). The quality and  
491 concentration of total RNA were analyzed by NanoDrop 2000 (Thermo Scientific, USA).  
492 Reverse transcription experiment was conducted with the commercially available  
493 PrimeScript RT reagent kit with gDNA Eraser (Takara Biotechnology, Japan) according  
494 to the manufacturer's instructions. The cDNAs of *carD* and *ascarD* were synthesized using  
495 gene-specific primers RT-*carD*-R or RT-*ascarD*-R, respectively (Table S3), which can  
496 distinguish the two transcripts. For qRT-PCR, *sigA* was used as the internal reference gene  
497 and the experiment was carried out according to reference (51).

#### 498 **CRISPRi-mediated gene knockdown strategy**

499 CRISPR/dCas9-mediated gene knockdown strategy (52) was carried out to construct the  
500 *AscarD*<sub>KD</sub> strain. Briefly, pRH2502 plasmid containing *int* and *dcas9* genes was integrated  
501 into the mc<sup>2</sup>155 genome to generate Ms/pRH2502 strain (Table S2). pRH2521 plasmid  
502 containing the small guide RNA (sgRNA) targeting *ascarD* was transferred into  
503 Ms/pRH2502 strain to obtain the final *AscarD*<sub>KD</sub> strain (Table S2). The expression of both  
504 *dcas9* and sgRNA requires the induction by anhydrotetracycline (ATc). The transcription  
505 of the target gene (*ascarD*) was inhibited with the induction by 50 ng/mL of ATc, and the  
506 inhibition efficiency was assessed by qRT-PCR. It is worth noting that dCas9:sgRNA  
507 complex exhibits a strong inhibitory effect on the expression of a gene after it combines  
508 with the coding strand of the gene, but almost does not affect the expression of the gene  
509 when it combines with the template strand. The sgRNA we designed is combined with the  
510 coding strand of *ascarD* (that is, the template strand of *ispD*), so it has a strong inhibitory



511 effect on the transcription of *ascarD* (reduced  $18.8 \pm 2.6$  times as quantitated by qRT-PCR),  
512 but has almost no effect on the transcription of *ispD*. The inhibition efficiency is shown in  
513 Fig. S7, and all related primers are listed in Table S3.

#### 514 **CRISPR/Cpf1-mediated mutagenesis**

515 CRISPR/Cpf1-mediated mutagenesis was carried out as described previously (26). This  
516 system consists of three parts: Cpf1, crRNA, and ssDNA oligonucleotide. The pJV53-*cpf1*  
517 plasmid was employed for the inducible (with 50 ng/mL ATc) expression of Cpf1. The  
518 pCR-Hyg-crRNA plasmid was used for the constitutive expression of crRNA. For the  
519 ssDNA oligonucleotide, a 59-nt oligonucleotide spanning the genome broken site and  
520 targeting the lagging strand of DNA replication was synthesized. The expected mutation  
521 was introduced into the middle of the oligonucleotide sequences. For gene mutation,  
522 pJV53-Cpf1 was first transformed into mc<sup>2</sup>155 to generate the recombinant strain  
523 Ms/pJV53-Cpf1. The recombinant vector pCR-Hyg-crRNA and the 59-nt oligonucleotide  
524 were then co-transformed into Ms/pJV53-Cpf1 strain. Mycobacterial cells were then  
525 spread onto 7H10 plates supplemented with the corresponding antibiotics and set to 37°C  
526 for growth. Three days later, clones were picked and verified by PCR and sequencing. The  
527 primers and DNA oligonucleotides used are listed in Table S3.

#### 528 **Construction of the *clpP2* conditional mutant**

529 Unlike *E. coli* ClpP that comprises a homo-tetradecamer, mycobacterial ClpP forms a  
530 hetero-tetradecamer comprising two proteases, ClpP1 and ClpP2, which are both essential,  
531 and deletion of either one of them leads to the loss of degradative activity (25). Therefore,  
532 for *clpP2* conditional mutant (*clpP2CM*) construction (Fig. S3), an exogenous *clpP2* gene  
533 amplified with *clpP2*-F/R primer pair (Table S3) was ligated to the pRH2502 integration  
534 plasmid to obtain pRH2502-*clpP2* recombinant plasmid, in which *clpP2* is under the  
535 control of ATc-inducible promoter P<sub>UV15tetO</sub>. The pRH2502-*clpP2* plasmid was then  
536 transformed and integrated into the mc<sup>2</sup>155 genome by *attB*-*attP* mediated site-specific  
537 recombination, to obtain Ms/pRH2502-*clpP2* strain (used as the control strain in Fig. 3A  
538 and 3B). Finally, the endogenous *clpP2* gene on Ms/pRH2502-*clpP2* genome was mutated  
539 (pre-translational termination) using the CRISPR/Cpf1-mediated mutagenesis. Thus,



540 *clpP2* could be expressed normally in the *clpP2CM* strain only upon addition of 50 ng/mL  
541 ATc, but could not do so when ATc was absent. It should be noted that, in principle, the  
542 *clpP2CM* strain cannot grow in the 7H9 medium without ATc. But when we first cultivated  
543 the *clpP2CM* cells to exponential phase in ATc-containing 7H9 medium, then harvested  
544 the cells, washed them, and inoculated them into ATc-free 7H9 medium (initial OD<sub>600</sub> =  
545 0.1), *clpP2CM* cells can grow slowly (Fig. 3D).

#### 546 **β-galactosidase experiment**

547 For P<sub>PU</sub> construction, the -213 – +21 region of *carD*, containing the *carD* promoter and 5'-  
548 untranslated region (5'-UTR), was fused to *lacZ*; for P<sub>PUC</sub>, the -213 – +895 region of *carD*,  
549 containing the *carD* promoter, 5'-UTR, and the *carD* coding sequence (CDS), was fused  
550 to *lacZ*; for P<sub>PUCP</sub>, the -213 – +1090 region of *carD*, containing the *carD* promoter, 5'-UTR,  
551 *carD* CDS, and *ascarD* promoter on the antisense strand, was fused to *lacZ*; for P<sub>PUCP\*</sub>,  
552 the modified -213 – +1090 region of *carD*, containing the *carD* promoter, 5'-UTR, *carD*  
553 CDS, and the mutated *ascarD* promoter (P<sub>ascarDM</sub>) on the antisense strand, was fused to  
554 *lacZ*. To measure the β-galactosidase activity, mc<sup>2</sup>155 derivatives were grown at 37°C.  
555 Mycobacterial cells equivalent of OD<sub>600</sub>=1 (e.g., 2 mL of each culture with OD<sub>600</sub> = 0.5)  
556 were harvested at the given times followed by washing with PBS. The detailed steps for β-  
557 galactosidase activity determination were carried out according to references (51, 53).

#### 558 **5'-Rapid amplification of cDNA ends (5'-RACE)**

559 To identify the TSS of *ascarD*, 5'-RACE analysis was performed with RNA extracted from  
560 mc<sup>2</sup>155 cells at mid-stationary phase grown in 7H9 medium. The 5'-RACE experiment  
561 was performed as described previously (54). The primers used are listed in Table S3.

#### 562 **Western blot**

563 For the Western blot, CarD was detected using CarD-specific rabbit polyclonal antibody  
564 that were prepared by Dia-An Biotech, Inc. (Wuhan, China). The specificity of the CarD  
565 polyclonal antibody is shown in Fig. S8. For SigA detection, His×6 tag was fused to the C-  
566 terminus of SigA by inserting its coding sequence immediately upstream of the *sigA* stop  
567 codon in the mc<sup>2</sup>155 genome, and the modified SigA-His×6 protein was detected using

568 rabbit polyclonal antibody to His×6 (Yeasen Biotech Co., Shanghai, China). Generally,  
569 KatG was used as the internal reference protein in Western blot experiments. However,  
570 since its level is affected by oxidative stress, SigA was used as an internal reference protein  
571 in the genotoxic stress stimulation experiment (Fig. 1B). The detailed procedures of  
572 Western blot were as described previously (55).

### 573 **CarD purification and *in vitro* protease degradation experiment**

574 The CarD protein used in the *in vitro* degradation assay was purified from *M. smegmatis*.  
575 *carD* coding sequence fused with a His×6 tag sequence was cloned into pMV261 plasmid  
576 and transformed into the mc<sup>2</sup>155 to obtain *carD*<sub>OE</sub> (Table S2). CarD-His protein was  
577 purified by affinity Ni<sup>2+</sup>-NTA column. The purified CarD protein was used as a substrate  
578 for *in vitro* protease degradation experiments. Mycobacterial cells harvested from the  
579 stationary phase were subjected to ultrasonication to obtain the total protein lysate, which  
580 was used to degrade the purified CarD protein. For *in vitro* degradation assay, 2 µg of CarD  
581 protein were incubated with 16 µg of either the total protein extract, boiled total protein  
582 extract (boiling for 15 min), or the protein extract containing 20 mM of EDTA,  
583 respectively. Samples were incubated at room temperature for 10 h, followed by Western  
584 blot analysis.

585

### 586 **Acknowledgments**

587 This work was supported by the National Natural Science Foundation of China (grants  
588 31970074, 31900057 and 31770087), the Fundamental Research Funds for the Central  
589 Universities (grants 2662017PY112 and 2662015PY175), and the China Postdoctoral  
590 Science Foundation (grant 2019M662654). MYG was supported by the Intramural  
591 Research Program of the U.S. National Library of Medicine at the NIH.

### 592 **Author Contributions**

593 X.F.L., F.C and J.H. designed the study. F.C., J.F.X., X.Y.L., X.F.L., and B.T.A.  
594 performed the experiments. F.C., X.F.L., X.C., and Q.T. analyzed the data. X.F.L., F.C.,  
595 S.H.C. and M.Y.G. wrote the original draft., M.Y.G., S.H.C., and J.H. prepared the final  
596 manuscript.

597 **References**

- 598 1. R. Y. Morita, "Starvation-survival of heterotrophs in the marine environment" in *Advances*  
599 *in Microbial Ecology*. (Springer, 1982), pp. 171-198.
- 600 2. B. J. Paul, W. Ross, T. Gaal, R. L. Gourse, rRNA transcription in *Escherichia coli*. *Annu*  
601 *Rev Genet* **38**, 749-770 (2004).
- 602 3. R. L. Gourse, T. Gaal, M. S. Bartlett, J. A. Appleman, W. Ross, rRNA transcription and  
603 growth rate-dependent regulation of ribosome synthesis in *Escherichia coli*. *Annu Rev*  
604 *Microbiol* **50**, 645-677 (1996).
- 605 4. R. L. Gourse *et al.*, Transcriptional responses to ppGpp and DksA. *Annu Rev Microbiol* **72**,  
606 163-184 (2018).
- 607 5. V. Haurlyliuk, G. C. Atkinson, K. S. Murakami, T. Tenson, K. Gerdes, Recent functional  
608 insights into the role of (p)ppGpp in bacterial physiology. *Nat Rev Microbiol* **13**, 298-309  
609 (2015).
- 610 6. M. Gengenbacher, S. H. Kaufmann, *Mycobacterium tuberculosis*: success through  
611 dormancy. *FEMS Microbiol Rev* **36**, 514-532 (2012).
- 612 7. E. Davis, J. Chen, K. Leon, S. A. Darst, E. A. Campbell, Mycobacterial RNA polymerase  
613 forms unstable open promoter complexes that are stabilized by CarD. *Nucleic Acids Res*  
614 **43**, 433-445 (2015).
- 615 8. J. Rammohan, A. Ruiz Manzano, A. L. Garner, C. L. Stallings, E. A. Galburt, CarD  
616 stabilizes mycobacterial open complexes via a two-tiered kinetic mechanism. *Nucleic*  
617 *Acids Res* **43**, 3272-3285 (2015).
- 618 9. J. Rammohan *et al.*, Cooperative stabilization of *Mycobacterium tuberculosis* *rrnAP3*  
619 promoter open complexes by RbpA and CarD. *Nucleic Acids Res* **44**, 7304-7313 (2016).
- 620 10. E. A. Hubin *et al.*, Structure and function of the mycobacterial transcription initiation  
621 complex with the essential regulator RbpA. *Elife* **6** (2017).
- 622 11. D. Jensen, A. R. Manzano, J. Rammohan, C. L. Stallings, E. A. Galburt, CarD and RbpA  
623 modify the kinetics of initial transcription and slow promoter escape of the *Mycobacterium*  
624 *tuberculosis* RNA polymerase. *Nucleic Acids Res* **47**, 6685-6698 (2019).
- 625 12. D. X. Zhu, A. L. Garner, E. A. Galburt, C. L. Stallings, CarD contributes to diverse gene  
626 expression outcomes throughout the genome of *Mycobacterium tuberculosis*. *Proc Natl*  
627 *Acad Sci U S A* **116**, 13573-13581 (2019).
- 628 13. A. Sudalayadum Perumal, R. K. Vishwakarma, Y. Hu, Z. Morichaud, K. Brodolin, RbpA  
629 relaxes promoter selectivity of *M. tuberculosis* RNA polymerase. *Nucleic Acids Res* **46**,  
630 10106-10118 (2018).
- 631 14. C. L. Stallings *et al.*, CarD is an essential regulator of rRNA transcription required for  
632 *Mycobacterium tuberculosis* persistence. *Cell* **138**, 146-159 (2009).
- 633 15. A. L. Garner *et al.*, Effects of increasing the affinity of CarD for RNA polymerase on  
634 *Mycobacterium tuberculosis* growth, rRNA transcription, and virulence. *J Bacteriol* **199**  
635 (2017).
- 636 16. A. L. Garner, L. A. Weiss, A. R. Manzano, E. A. Galburt, C. L. Stallings, CarD integrates  
637 three functional modules to promote efficient transcription, antibiotic tolerance, and

- 638 pathogenesis in mycobacteria. *Mol Microbiol* **93**, 682-697 (2014).
- 639 17. L. A. Weiss *et al.*, Interaction of CarD with RNA polymerase mediates *Mycobacterium*  
640 *tuberculosis* viability, rifampin resistance, and pathogenesis. *J Bacteriol* **194**, 5621-5631  
641 (2012).
- 642 18. D. B. Srivastava *et al.*, Structure and function of CarD, an essential mycobacterial  
643 transcription factor. *Proc Natl Acad Sci U S A* **110**, 12619-12624 (2013).
- 644 19. S. E. Irving, R. M. Corrigan, Triggering the stringent response: signals responsible for  
645 activating (p)ppGpp synthesis in bacteria. *Microbiology* **164**, 268-276 (2018).
- 646 20. A. Rasouly, B. Pani, E. Nudler, A magic spot in genome maintenance. *Trends Genet* **33**,  
647 58-67 (2017).
- 648 21. A. Srivatsan, J. D. Wang, Control of bacterial transcription, translation and replication by  
649 (p)ppGpp. *Curr Opin Microbiol* **11**, 100-105 (2008).
- 650 22. M. J. Smeulders, J. Keer, R. A. Speight, H. D. Williams, Adaptation of *Mycobacterium*  
651 *smegmatis* to stationary phase. *J Bacteriol* **181**, 270-283 (1999).
- 652 23. U. Gerth *et al.*, Clp-dependent proteolysis down-regulates central metabolic pathways in  
653 glucose-starved *Bacillus subtilis*. *J Bacteriol* **190**, 321-331 (2008).
- 654 24. D. Schultz, R. Schluter, U. Gerth, M. Lalk, Metabolic perturbations in a *Bacillus subtilis*  
655 *clpP* mutant during glucose starvation. *Metabolites* **7** (2017).
- 656 25. R. M. Raju *et al.*, Post-translational regulation via Clp protease is critical for survival of  
657 *Mycobacterium tuberculosis*. *PLoS Pathog* **10**, e1003994 (2014).
- 658 26. M. Y. Yan *et al.*, CRISPR-Cas12a-assisted recombineering in bacteria. *Appl Environ*  
659 *Microbiol* **83** (2017).
- 660 27. X. Li *et al.*, Transcriptome landscape of *Mycobacterium smegmatis*. *Front Microbiol* **8**,  
661 2505 (2017).
- 662 28. J. Georg, W. R. Hess, *cis*-antisense RNA, another level of gene regulation in bacteria.  
663 *Microbiol Mol Biol Rev* **75**, 286-300 (2011).
- 664 29. B. Bae *et al.*, CarD uses a minor groove wedge mechanism to stabilize the RNA polymerase  
665 open promoter complex. *Elife* **4** (2015).
- 666 30. A. China, S. Mishra, P. Tare, V. Nagaraja, Inhibition of *Mycobacterium tuberculosis* RNA  
667 polymerase by binding of a Gre factor homolog to the secondary channel. *J Bacteriol* **194**,  
668 1009-1017 (2012).
- 669 31. L. A. Weiss, C. L. Stallings, Essential roles for *Mycobacterium tuberculosis* Rel beyond  
670 the production of (p)ppGpp. *J Bacteriol* **195**, 5629-5638 (2013).
- 671 32. J. Prusa, D. X. Zhu, C. L. Stallings, The stringent response and *Mycobacterium*  
672 *tuberculosis* pathogenesis. *Pathog Dis* **76** (2018).
- 673 33. S. Tojo, K. Kumamoto, K. Hirooka, Y. Fujita, Heavy involvement of stringent transcription  
674 control depending on the adenine or guanine species of the transcription initiation site in  
675 glucose and pyruvate metabolism in *Bacillus subtilis*. *J Bacteriol* **192**, 1573-1585 (2010).
- 676 34. A. Kriel *et al.*, Direct regulation of GTP homeostasis by (p)ppGpp: a critical component of  
677 viability and stress resistance. *Mol Cell* **48**, 231-241 (2012).

- 678 35. P. Tare, B. Mallick, V. Nagaraja, Co-evolution of specific amino acid in sigma 1.2 region  
679 and nucleotide base in the discriminator to act as sensors of small molecule effectors of  
680 transcription initiation in mycobacteria. *Mol Microbiol* **90**, 569-583 (2013).
- 681 36. M. I. Voskuil *et al.*, Inhibition of respiration by nitric oxide induces a *Mycobacterium*  
682 *tuberculosis* dormancy program. *J Exp Med* **198**, 705-713 (2003).
- 683 37. T. Chopra *et al.*, Quantitative mass spectrometry reveals plasticity of metabolic networks  
684 in *Mycobacterium smegmatis*. *Mol Cell Proteomics* **13**, 3014-3028 (2014).
- 685 38. S. Abel *et al.*, Regulatory cohesion of cell cycle and cell differentiation through interlinked  
686 phosphorylation and second messenger networks. *Mol Cell* **43**, 550-560 (2011).
- 687 39. D. B. Trentini *et al.*, Arginine phosphorylation marks proteins for degradation by a Clp  
688 protease. *Nature* **539**, 48-53 (2016).
- 689 40. J. A. Opdyke, J. G. Kang, G. Storz, GadY, a small-RNA regulator of acid response genes  
690 in *Escherichia coli*. *J Bacteriol* **186**, 6698-6705 (2004).
- 691 41. A. Tramonti, M. De Canio, D. De Biase, GadX/GadW-dependent regulation of the  
692 *Escherichia coli* acid fitness island: transcriptional control at the *gadY-gadW* divergent  
693 promoters and identification of four novel 42 bp GadX/GadW-specific binding sites. *Mol*  
694 *Microbiol* **70**, 965-982 (2008).
- 695 42. J. A. Opdyke, E. M. Fozo, M. R. Hemm, G. Storz, RNase III participates in GadY-  
696 dependent cleavage of the *gadX-gadW* mRNA. *J Mol Biol* **406**, 29-43 (2011).
- 697 43. A. Dey, A. K. Verma, D. Chatterji, Role of an RNA polymerase interacting protein,  
698 MsRbpA, from *Mycobacterium smegmatis* in phenotypic tolerance to rifampicin.  
699 *Microbiology* **156**, 873-883 (2010).
- 700 44. Y. Hu, Z. Morichaud, A. S. Perumal, F. Roquet-Baneres, K. Brodolin, *Mycobacterium*  
701 RbpA cooperates with the stress-response  $\sigma^B$  subunit of RNA polymerase in promoter  
702 DNA unwinding. *Nucleic Acids Res* **42**, 10399-10408 (2014).
- 703 45. Y. Hu, A. R. Coates, Transcription of two sigma 70 homologue genes, *sigA* and *sigB*, in  
704 stationary-phase *Mycobacterium tuberculosis*. *J Bacteriol* **181**, 469-476 (1999).
- 705 46. P. A. Fontán *et al.*, The *Mycobacterium tuberculosis* sigma factor sigmaB is required for  
706 full response to cell envelope stress and hypoxia in vitro, but it is dispensable for *in vivo*  
707 growth. *J Bacteriol* **191**, 5628-5633 (2009).
- 708 47. D. Pisu *et al.*, The alternative sigma factors SigE and SigB are involved in tolerance and  
709 persistence to antitubercular drugs. *Antimicrob Agents Chemother* **61** (2017).
- 710 48. M. Yang, C. Gao, T. Cui, J. An, Z. G. He, A TetR-like regulator broadly affects the  
711 expressions of diverse genes in *Mycobacterium smegmatis*. *Nucleic Acids Res* **40**, 1009-  
712 1020 (2012).
- 713 49. F. Yang *et al.*, Development and application of a recombination-based library versus  
714 library high-throughput yeast two-hybrid (RLL-Y2H) screening system. *Nucleic Acids Res*  
715 **46**, e17 (2018).
- 716 50. L. G. Wayne, L. G. Hayes, An *in vitro* model for sequential study of shutdown of  
717 *Mycobacterium tuberculosis* through two stages of nonreplicating persistence. *Infect*  
718 *Immun* **64**, 2062-2069 (1996).

- 719 51. Q. Tang *et al.*, *Mycobacterium smegmatis* BioQ defines a new regulatory network for  
720 biotin metabolism. *Mol Microbiol* 10.1111/mmi.12817 (2014).
- 721 52. A. K. Singh *et al.*, Investigating essential gene function in *Mycobacterium tuberculosis*  
722 using an efficient CRISPR interference system. *Nucleic Acids Res* **44**, e143 (2016).
- 723 53. M. K. Ali *et al.*, Regulation of inducible potassium transporter KdpFABC by the  
724 KdpD/KdpE two-component system in *Mycobacterium smegmatis*. *Front Microbiol* **8**, 570  
725 (2017).
- 726 54. X. Wang *et al.*, A c-di-AMP riboswitch controlling *kdpFABC* operon transcription  
727 regulates the potassium transporter system in *Bacillus thuringiensis*. *Commun Biol* **2**, 151  
728 (2019).
- 729 55. T. S. Hnasko, R. M. Hnasko, "The Western blot" in ELISA. (Springer, 2015), pp. 87-96.  
730
