1     **Clp protease and antisense RNA jointly regulate the global regulator CarD to**  
2                     **mediate mycobacterial starvation response**

3  
4     **Xinfeng Li <sup>1,†</sup>, Fang Chen <sup>1,†</sup>, Xiaoyu Liu <sup>1</sup>, Jinfeng Xiao <sup>1</sup>, Binda T. Andongma <sup>1</sup>, Qing Tang**  
5     **<sup>1</sup>, Xiaojian Cao <sup>1</sup>, Shan-Ho Chou <sup>1</sup>, Michael Y. Galperin <sup>2</sup>, Jin He <sup>1,\*</sup>**

6  
7     <sup>1</sup>State Key Laboratory of Agricultural Microbiology & Hubei Hongshan Laboratory, College of  
8     Life Science and Technology, Huazhong Agricultural University, Wuhan, Hubei 430070, China

9     <sup>2</sup>National Center for Biotechnology Information, National Library of Medicine, National  
10    Institutes of Health, Bethesda, MD 20894, USA

11  
12    <sup>†</sup>These authors contributed equally to this work.

13  
14    \* Correspondence: [hejin@mail.hzau.edu.cn](mailto:hejin@mail.hzau.edu.cn)

15

16 **Abstract**

17 Under starvation conditions, bacteria tend to slow down their translation rate by reducing rRNA  
18 synthesis, but the way they accomplish that may vary in different bacteria. In *Mycobacterium*  
19 species, transcription of rRNA is activated by the RNA polymerase (RNAP) accessory  
20 transcription factor CarD, which interacts directly with RNAP to stabilize the RNAP-promoter  
21 open complex formed on rRNA genes. The functions of CarD have been extensively studied, but  
22 the mechanisms that control its expression remain obscure. Here, we report that the level of CarD  
23 was tightly regulated when mycobacterial cells switched from nutrient-rich to nutrient-deprived  
24 conditions. At the translational level, an antisense RNA of *carD* (AscarD) was induced in a SigF-  
25 dependent manner to bind with *carD* mRNA and inhibit CarD translation, while at the post-  
26 translational level, the residual intracellular CarD was quickly degraded by the Clp protease.  
27 AscarD thus worked synergistically with Clp protease to decrease the CarD level to help  
28 mycobacterial cells cope with the nutritional stress. Altogether, our work elucidates the regulation  
29 mode of CarD and delineates a new mechanism for the mycobacterial starvation response, which  
30 is important for the adaptation and persistence of mycobacterial pathogens in the host environment.

31

## 32 **Introduction**

33 Bacterial starvation response refers to the physiological changes occurring in bacteria due to the  
34 lack of external nutrients during their growth and reproduction (Morita, 1982). Under starvation  
35 conditions, bacterial cells usually reduce the synthesis of rRNA and ribosome proteins (Gourse et  
36 al., 1996; Paul et al., 2004). The mechanisms of starvation response that have been elucidated in  
37 such bacteria as *Escherichia coli* and *Bacillus subtilis* work primarily by reducing rRNA  
38 transcription via decreasing the stability of the transcription initiation complex (Gourse et al., 2018;  
39 Hauryliuk et al., 2015).

40 *Mycobacterium* is a widespread genus of Gram-positive bacteria that comprises several  
41 important pathogens, including *Mycobacterium tuberculosis*, the causative agent of tuberculosis,  
42 which kills ~1.5 million people every year. One of the main difficulties in eliminating *M.*  
43 *tuberculosis* is that it usually responds to various host stresses, such as nutritional starvation, low  
44 oxygen, and low pH, by entering into a dormant state, which renders the organism extremely  
45 resistant to host defenses (Gengenbacher and Kaufmann, 2012). This genus also includes non-  
46 pathogens, such as *M. smegmatis*, which is widely used as a model organism for mycobacterial  
47 research. At present, the starvation response mechanisms of mycobacterial cells remain obscure.

48 Mycobacterial RNA polymerase (RNAP) is usually less efficient in forming RNAP-promoter  
49 open complex (RPo) than *E. coli* RNAP on the rRNA genes (Davis et al., 2015), and the RPo  
50 formed is rather unstable and readily reversible (Davis et al., 2015; Rammohan et al., 2015). To  
51 overcome this deficiency, mycobacterial cells have evolved two accessory transcription factors,  
52 CarD and RbpA, that help RNAP form a stable RPo (Hubin et al., 2017; Jensen et al., 2019;  
53 Rammohan et al., 2016). Both are global transcription factors that interact directly with RNAP to  
54 regulate the transcription of many downstream genes, including those of rRNA (Rammohan et al.,  
55 2016; Sudalayadum Perumal et al., 2018; Zhu et al., 2019). CarD stabilizes mycobacterial RPo via  
56 a two-tiered kinetic mechanism. First, CarD binds to the RNAP-promoter closed complex (RPc) to  
57 increase the rate of DNA opening; then, CarD associates with RPo with a high affinity to prevent  
58 the DNA bubble collapse (Davis et al., 2015; Hubin et al., 2017; Rammohan et al., 2015). Although  
59 binding of CarD to RNAP tends to increase the stability of RPo, it may also delay the dissociation  
60 of RNAP from the promoter region and thus hinder transcription progress (Jensen et al., 2019).  
61 Therefore, CarD may also inhibit the expression of certain genes. Whether CarD activates or

62 inhibits the expression of a specific target gene appears to be determined by the kinetics of the  
63 initiation complex formation among CarD, RNAP, and the specific promoter (Jensen et al., 2019;  
64 Zhu et al., 2019). CarD was found to be essential for the survival of mycobacterial cells (Stallings  
65 et al., 2009) and weakening the interaction between CarD and RNAP rendered mycobacterial cells  
66 more sensitive to oxidative stress, DNA damage, and the effect of some antibiotics (Garner et al.,  
67 2014; Stallings et al., 2009; Weiss et al., 2012). A recent study showed that CarD regulates (either  
68 activates or inhibits) the expression of approximately two-thirds of genes in *M. tuberculosis* (Zhu  
69 et al., 2019). Despite the fact that CarD plays such a critical role in mycobacteria, the mechanisms  
70 that regulate its cellular levels remain largely uncharacterized.

71 It is worth noting that CarD was initially thought to inhibit the transcription of rRNA genes, and  
72 the transcription of *carD* was up-regulated in response to starvation (Stallings et al., 2009).  
73 However, more recently, it was reported that CarD is a transcriptional activator of rRNA genes  
74 (Rammohan et al., 2015; Srivastava et al., 2013) and the growth rates of mycobacterial cells  
75 positively correlate with the CarD content (Garner et al., 2017; Stallings et al., 2009; Weiss et al.,  
76 2012). Nevertheless, the expression of CarD is still considered to be up-regulated in response to  
77 starvation. If this was the case, the increased CarD would accelerate rRNA synthesis and  
78 mycobacterial growth under the starvation condition, which seems to contradict the current  
79 consensus (Irving and Corrigan, 2018; Rasouly et al., 2017; Srivatsan and Wang, 2008). Therefore,  
80 it is important to clarify the regulation of CarD expression under starvation conditions. In the  
81 current study, we found that although *carD* transcript levels were upregulated in response to  
82 starvation, its protein level dramatically decreased. Further, we found that the reduction of CarD  
83 protein level under starvation conditions is a common regulatory mechanism that depends upon the  
84 functioning of both antisense RNA and Clp protease. This study describes the mechanisms behind  
85 the apparent contradiction between CarD mRNA and protein levels and reveals a new mechanism  
86 of mycobacterial response to stress.

## 87 **Results**

### 88 **CarD protein level increases under genotoxic stresses but dramatically decreases under** 89 **starvation conditions**

90 CarD is an essential RNAP-interacting protein that regulates the transcription of rRNA genes  
91 and many related genes by stabilizing the RPo. While Stallings and colleagues found that the *carD*

92 gene is up-regulated in response to starvation and genotoxic stresses in *M. smegmatis* strain mc<sup>2</sup>155  
 93 (Stallings et al., 2009), they only monitored the transcriptional level but not the translation of *carD*,  
 94 which may not truly reflect the CarD protein content. Therefore, to clarify the dynamics of CarD  
 95 content under the starvation condition and genotoxic stresses, we examined both the *carD* transcript  
 96 and CarD protein levels in the mc<sup>2</sup>155 strain by qRT-PCR and Western blot experiments,  
 97 respectively. As shown in Figure 1, panels A and B, both *carD* transcript and CarD protein levels  
 98 increased under genotoxic stresses triggered by H<sub>2</sub>O<sub>2</sub>, methyl methanesulfonate (MMS), or  
 99 ciprofloxacin (CIP), which was consistent with the previous reports that CarD may be involved in  
 100 DNA damage repair (Stallings et al., 2009). However, although the *carD* transcript level increased  
 101 in response to starvation (Figure 1A), the CarD protein level, instead, decreased (marked by an  
 102 arrow in Figure 1B). This observation indicated that CarD is down-regulated, not up-regulated as  
 103 previously reported (Stallings et al., 2009), under the starvation condition.

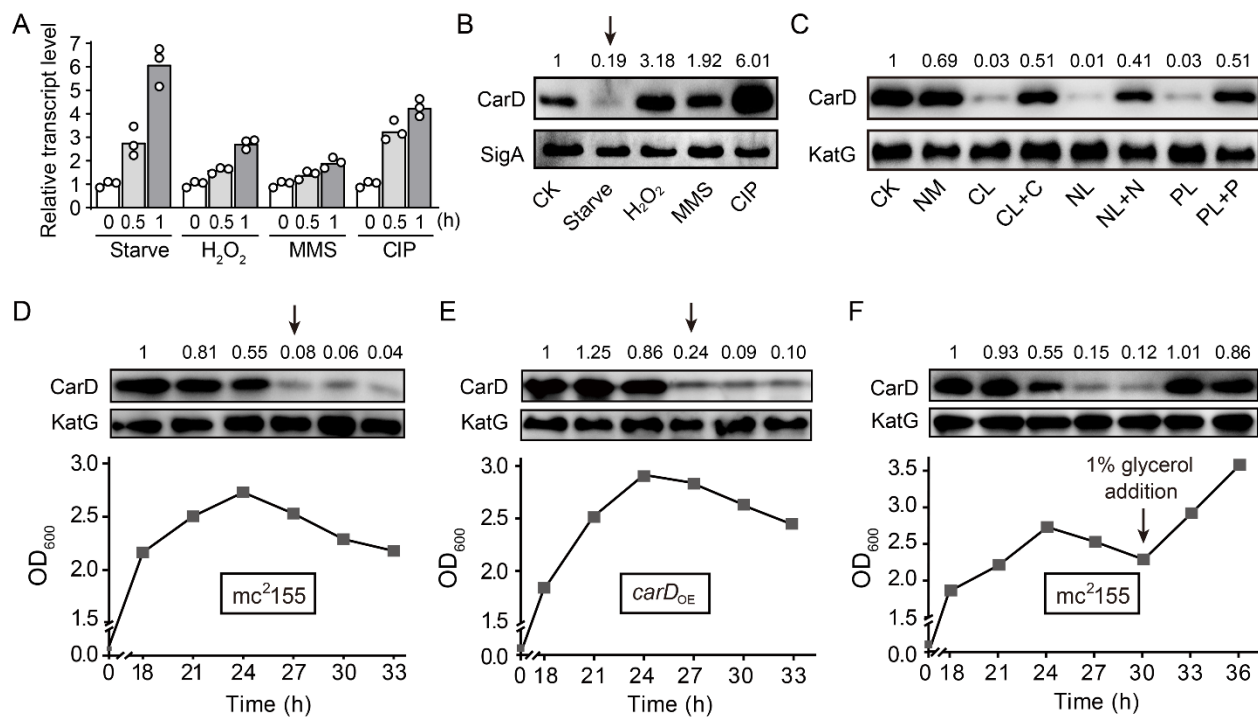

104  
 105 **Figure 1. Changes of CarD transcript and protein levels under starvation and genotoxic stress.** A and B,  
 106 the transcript and protein levels of CarD, respectively, under different stress conditions. The *carD* transcript  
 107 levels in the treated exponential mc<sup>2</sup>155 cells were measured by qRT-PCR, normalized to the *sigA* transcript  
 108 levels, and expressed as the fold change of untreated cells. CK indicates the untreated cells of mc<sup>2</sup>155. “Starve”  
 109 means that mc<sup>2</sup>155 cells were first cultured in the 7H9 medium, and then transferred to phosphate-buffered saline  
 110 (PBS) for 0.5 h or 1 h. For stimulation experiments, 10 mM H<sub>2</sub>O<sub>2</sub>, 0.1% methyl methanesulfonate (MMS), and

111 10 µg/mL of ciprofloxacin (CIP) were used. Individual data for the three biological replicates are shown in the  
112 corresponding columns. Western blot was used to detect the CarD protein levels under the same treatment  
113 conditions with SigA serving as the internal reference protein. **C**, protein levels of CarD under distinct starvation  
114 conditions. CK indicates the untreated exponential cells; NM indicates the exponential cells transferred into the  
115 normal medium for 4 h; CL, NL, and PL indicate the exponential cells transferred into carbon-limited, nitrogen-  
116 limited, and phosphorus-limited media for 4 h, respectively; CL+C, NL+N, and PL+P indicate the starved mc<sup>2</sup>155  
117 cultures supplemented with the corresponding nutrients for 4 h. KatG was used as the control in the Western blot  
118 experiments. **D-F**, CarD protein levels at the different growth stages in mc<sup>2</sup>155 (**D** and **F**), and *carD* over-  
119 expressing strain (*carD*<sub>OE</sub>, panel **E**). The lower part of the chart shows the respective growth curves with the  
120 sampling times. For panels **B-F**, the number on each band of the Western blot results represent their relative  
121 quantitative values, which are normalized with respect to their corresponding loading controls.

122 Figure 1 includes the following figure supplement:

123 **Figure supplement 1.** Changes of *carD* levels in *M. smegmatis* under different conditions and different strains.  
124

125 To investigate whether the decline in the CarD level is due to the lack of a specific nutrient or to  
126 a general response to starvation stress, we investigated the changes in CarD levels under carbon-,  
127 nitrogen-, and phosphorus-starvation conditions. We first cultured mc<sup>2</sup>155 cells to mid-exponential  
128 phase (MEP), harvested the cells, and then transferred these cells to the normal medium (NM),  
129 carbon-limited (CL), nitrogen-limited (NL), and phosphorus-limited (PL) medium, followed by  
130 detecting the respective mRNA and protein levels of CarD. It is worth noting that although the  
131 *carD* mRNA level increased in response to starvation conditions (Figure 1–figure supplement 1A),  
132 the CarD protein level decreased (Figure 1C). When the nutrient-limited media were supplemented  
133 with the corresponding nutrients, CarD returned to normal levels.

134 Since the mycobacterial cells in the stationary phase are in the state of nutritional starvation  
135 (Smeulders et al., 1999), we also measured the CarD protein levels at different growth periods of  
136 strain mc<sup>2</sup>155. As shown in Figure 1D, the CarD level remained relatively constant in the  
137 exponential phase but dropped sharply in the early stationary phase (marked by an arrow in Figure  
138 1D), which is consistent with the above starvation experiments. To further verify this result, we  
139 constructed a *carD* over-expressing strain (*carD*<sub>OE</sub>) (Figure 1–figure supplement 1B-D) and  
140 measured CarD protein levels at different growth periods. Interestingly, despite *carD*  
141 overexpression, the CarD protein level still decreased dramatically when the mycobacterial cells

142 entered the stationary phase (marked by an arrow in Figure 1E). Since the carbon source in the  
143 culture medium was likely depleted when the mycobacterial cells entered the stationary phase  
144 (Smeulders et al., 1999), we speculated that the decrease in the CarD protein level could be caused  
145 by carbon starvation. To verify this hypothesis, we added 1% glycerol (glycerol is the main carbon  
146 source under normal culture conditions of *M. smegmatis*) to the mc<sup>2</sup>155 culture in the stationary  
147 phase and measured the CarD protein level 3 and 6 hours after that. As shown in Figure 1F, the  
148 CarD level significantly increased after the glycerol addition, and the mc<sup>2</sup>155 cells resumed normal  
149 growth. Considering that CarD activates the transcription of rRNA (Rammohan et al., 2015;  
150 Srivastava et al., 2013), and that cells need to reduce rRNA levels in response to starvation (Gourse  
151 et al., 2018), we believe that the reduction in the CarD level under starvation conditions may be an  
152 adaptive response of mycobacterial cells. Yet, when nutrients became available, CarD quickly  
153 returned to its normal level to allow the cells to resume growth.

#### 154 **CarD levels are dramatically decreased in *M. bovis* BCG and *M. tuberculosis* under host-like** 155 **stress conditions**

156 To investigate whether the significant reduction of CarD levels under starvation conditions also  
157 happens in other mycobacterial species, we carried out starvation experiments in two other  
158 mycobacteria, *M. bovis* BCG and *M. tuberculosis* H37Ra. The results are consistent with those in  
159 *M. smegmatis*, that is, CarD levels were all significantly reduced in response to carbon-, nitrogen-,  
160 and phosphorus-starvation conditions (Figure 2A, B). When nutrient-limited cultures were  
161 supplemented with the corresponding nutrients, CarD returned to the normal levels. In addition,  
162 we also measured the CarD levels at different growth phases of the two strains. As shown in Figure  
163 2C and D, CarD levels were dramatically decreased when BCG and H37Ra cells entered the  
164 stationary phase, which is also consistent with the results in *M. smegmatis*. The above results  
165 indicate that the rapid reduction of the CarD level in response to starvation is a common  
166 phenomenon in mycobacteria, and regulating CarD content to cope with nutritional starvation is a  
167 conserved mechanism for the mycobacterial adaptive response.

168 It is important to note that after infecting the host, pathogenic mycobacteria not only suffer from  
169 nutritional deprivation but are also exposed to hypoxic and acidic conditions. Therefore, to explore  
170 whether CarD plays a role in the adaptation of mycobacterial cells to the host environment, we  
171 measured CarD levels under these conditions. As shown in Figure 2E, CarD levels were



172 significantly decreased when the mycobacterial cells were transferred to the low pH media. For the  
 173 hypoxic conditions, similarly, CarD levels were also reduced when mycobacterial cells were under  
 174 hypoxic stress and returned to normal after the cultures were re-aerated (Figure 2F and Figure 2–  
 175 figure supplement 1). These results suggest that mycobacterial cells reduce CarD levels in response  
 176 to host stresses to slow down their translation and metabolic rates, which likely contributes to the  
 177 adaptation of pathogenic mycobacteria to the hostile environment.

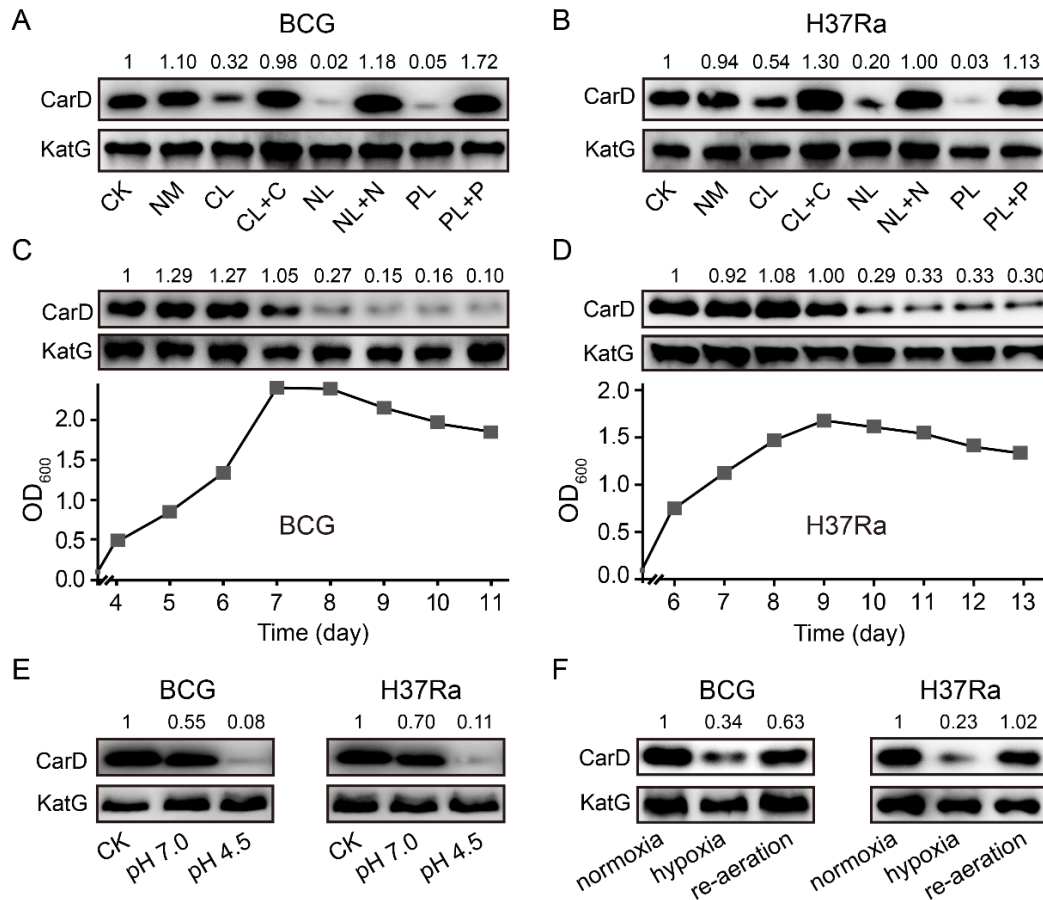

178  
 179 **Figure 2. Changes of CarD levels in *M. bovis* BCG and *M. tuberculosis* H37Ra under host-like stress**  
 180 **conditions.** **A** and **B**, the protein levels of CarD in BCG and H37Ra strains, respectively, under distinct starvation  
 181 conditions. **C** and **D**, CarD protein levels at the different growth stages of BCG and H37Ra, respectively. **E**,  
 182 CarD protein levels in BCG and H37Ra under different pH conditions. **F**, CarD protein levels in BCG and H37Ra  
 183 under different oxygen availability conditions. For all panels, the number on each band of the Western blot results  
 184 represent their relative quantitative values, which are normalized with respect to their corresponding loading  
 185 controls.

186 Figure 2 includes the following figure supplement:

187 **Figure supplement 1.** Changes of CarD levels in *M. smegmatis* under host-like stress conditions.



## 188 **Clp protease degrades CarD under starvation conditions**

189 Since the CarD protein level decreased dramatically under nutritional starvation, hypoxic, and  
190 acidic conditions, we speculated that CarD might be proteolytically degraded. Clp is a special  
191 energy-dependent protease that regulates the response to various stresses (Michel et al., 2006; Raju  
192 et al., 2012; Schultz et al., 2017). The typical Clp proteolytic complex is formed by the association  
193 of ClpP, the main proteolytic unit, with an AAA+ (ATPases associated with a variety of cellular  
194 activities) unfoldase, either ClpX or ClpA/ClpC (Kirstein et al., 2009). Unlike most other bacteria,  
195 mycobacteria harbor two ClpP isoforms (ClpP1 and ClpP2), which associate with each other to  
196 form the ClpP1P2 hetero-tetradecamers (Akopian et al., 2012; Li et al., 2016). Through a  
197 quantitative proteomics approach, Raju et al. found that the CarD protein level in the *clpP2*  
198 conditional deletion mutant was up-regulated (Raju et al., 2014). However, that study only  
199 measured CarD in the exponential phase, not in the stationary phase. Therefore, it was unclear  
200 whether Clp protease mediates the efficient degradation of CarD in the stationary phase. To address  
201 this question, we constructed a *clpP2* conditional mutant (*clpP2CM*) (Figure 3–figure supplement  
202 1) through the CRISPR/Cpf1-mediated gene editing strategy (Yan et al., 2017), in which *clpP2*  
203 could be expressed normally only upon addition of 50 ng/mL anhydrotetracycline (ATc), but could  
204 not do so when ATc was absent.

205 To explore the role of Clp protease in CarD degradation, we conducted ClpP2 depletion  
206 experiments. The cells of the *clpP2CM* mutant and control cells (*Ms/pRH2502-clpP2*) were first  
207 cultured in ATc-containing medium to the late exponential phase ( $OD_{600} \approx 1.5$ ), then harvested,  
208 washed, and re-inoculated in the fresh medium with or without ATc. The results showed that CarD  
209 was effectively degraded when the control cells entered the stationary phase, regardless of the  
210 presence of ATc (Figure 3A, B). In the *clpP2CM* strain, CarD was also effectively degraded in the  
211 stationary phase when ATc was added to induce the *clpP2* expression (Figure 3C) but persisted  
212 when *clpP2* was not induced (Figure 3D). These results indicate that ClpP2 was essential for the  
213 efficient degradation of CarD in the stationary phase.

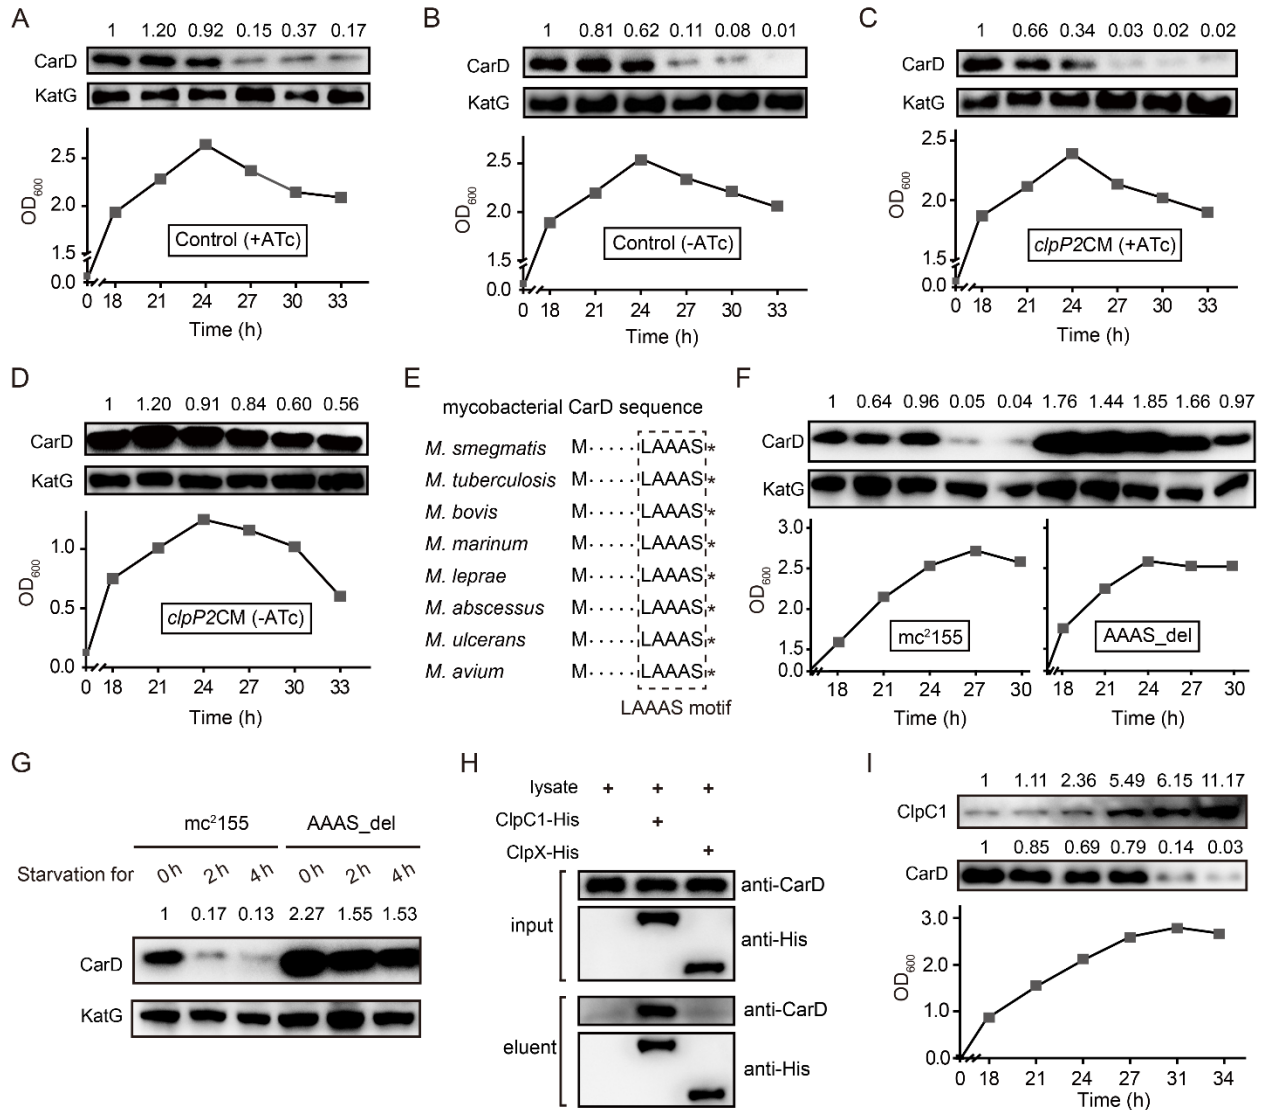

214

215 **Figure 3. Clp protease is responsible for CarD degradation in the stationary phase.** A-D The cells were

216 first cultured in ATc-containing medium to the exponential phase ( $OD_{600} \approx 1.5$ ), then harvested,

217 washed, and re-inoculated in a fresh medium with or without ATc. 0 h is the time when exponential

218 cells were re-inoculated into the fresh medium. A and B, the intracellular CarD levels at different time

219 points of the ATc-induced and ATc-uninduced control cells (*Ms/pRH2502-clpP2*), respectively. C and D, the

220 CarD levels at different time points of the ATc-induced and ATc-uninduced *clpP2CM* (*clpP2* conditional mutant)

221 cells, respectively. KatG was used as the control in the Western blot experiments. E, Conservation of the LAAAS

222 motif in mycobacterial CarD. The asterisk after the LAAAS motif indicates the stop codon. F, CarD protein

223 levels at the different growth stages of *mc*<sup>2</sup>155 and AAAS<sub>del</sub> cells. G, The starvation experiments of *mc*<sup>2</sup>155

224 and AAAS<sub>del</sub> cells. H, Verification of the interaction between CarD and ClpC1/ClpX by pull-down assay. I,

225 Protein levels of ClpC1 and CarD at different growth phases. For panels **A-D**, **F-G** and **I**, the numbers above  
226 each band of the Western blot represent their relative quantitative values.

227 Figure 3 includes the following figure supplements:

228 **Figure supplement 1.** Schematic diagram for the construction of the *clpP2* conditional mutant.

229 **Figure supplement 2.** Clp protease degrades CarD under the starvation condition.

230  
231 To investigate whether Clp protease is also required for degrading intracellular CarD under  
232 starvation conditions, we carried out a series of starvation experiments on *clpP2CM* cells harvested  
233 from the MEP. The results showed that CarD was effectively degraded when the ATc-induced  
234 *clpP2CM* cells were starved in PBS for 4 h, while in the ATc-uninduced *clpP2CM* cells CarD was  
235 not degraded (Figure 3–figure supplement 2A and B). This result is consistent with the  
236 experimental data described above, allowing us to conclude that Clp protease was responsible for  
237 the degradation of CarD under starvation conditions.

238 Moreover, mycobacterial CarD contains a highly conserved C-terminal "LAAAS" sequence  
239 (Figure 3E), which is similar to the Clp protease recognition motif (Gallego-Garcia et al., 2017;  
240 Hoskins and Wickner, 2006; Lunge et al., 2020). To study whether this region mediates the  
241 degradation of CarD by Clp protease under stress conditions, we deleted the "AAAS" coding  
242 sequence from the *M. smegmatis carD* gene and checked the CarD protein levels under stationary  
243 phase and starvation conditions. The results show that CarD in mc<sup>2</sup>155 is almost completely  
244 degraded under stress conditions, while CarD in the "AAAS" deletion mutant (AAAS\_del) is still  
245 highly retained (Figure 3F, G). This indicates that the deletion of the "AAAS" motif largely  
246 prevented the Clp protease from degrading CarD. These results further strengthen the notion that  
247 Clp protease degrades CarD under starvation conditions.

248 Additionally, the efficient degradation of large proteins by Clp protease requires their unfolding  
249 in the presence of an AAA<sup>+</sup> unfoldase (Akopian et al., 2012; Schmitz and Sauer, 2014).  
250 Mycobacteria harbor two functional Clp-associated unfoldases, ClpX and ClpC1 (Li et al., 2016;  
251 Schmitz and Sauer, 2014). Previous proteomics data showed that the CarD protein level is  
252 significantly up-regulated when ClpC1 is depleted, suggesting that CarD is a substrate of ClpC1  
253 (Lunge et al., 2020). To further confirm this result, we carried out an additional pull-down assay.  
254 The results showed that CarD does interact directly with ClpC1, but not with ClpX (Figure 3H).

255 Therefore, we believe that ClpC1 specifically mediated the degradation of CarD. Furthermore, to  
256 clarify why CarD was more effectively degraded in the stationary phase, we monitored the protein  
257 levels of ClpP1, ClpP2, and ClpC1. The results showed that the protein levels of ClpP1 and ClpP2  
258 were relatively constant throughout the growth phase (Figure 3–figure supplement 2C and D),  
259 while the level of ClpC1 protein was significantly up-regulated during the stationary phase (Figure  
260 3I). Since ClpC1 is the ATPase required for CarD recognition, unfolding, and translocation, its  
261 content likely determines the degradation efficiency of CarD. Therefore, we suggest that the  
262 increase of ClpC1 level contributes to the efficient degradation of CarD during the stationary phase.

### 263 **Starvation induces the transcription of antisense RNA of *carD***

264 Next, we wanted to know whether the intracellular CarD content is subject to other types of  
265 regulation other than degradation by Clp protease. After mining our previously published RNA-  
266 seq data of strain mc<sup>2</sup>155 (Li et al., 2017), we identified an antisense RNA transcribed from the  
267 antisense strand of the *carD-ispD* operon. As shown in Figure 4A, this antisense RNA (named  
268 AscarD) is partially complementary to the coding region of *ispD* but fully complementary to the  
269 coding region of *carD*. The RNA-seq data also showed that *ascarD* was specifically induced in the  
270 MSP (Figure 4A), and we confirmed this by RT-PCR (Figure 4–figure supplement 1A and B).  
271 Moreover, to determine the specific period when *ascarD* was induced, we examined the RNA level  
272 of AscarD throughout the growth phase, and the results showed that *ascarD* was induced at the  
273 onset of the stationary phase (Figure 4–figure supplement 1C).

274 To better characterize AscarD, we determined its transcriptional start site (TSS) by carrying out  
275 the 5'-RACE (5'-Rapid Amplification of cDNA Ends) experiment (Figure 4B). The TSS identified  
276 by 5'-RACE was consistent with that revealed by the RNA-seq data. We also discovered potential  
277 SigF-recognized -10 and -35 motifs upstream of the identified TSS (Hartkoorn et al., 2012; Humpel  
278 et al., 2010) (Figure 4C). SigF is an alternative sigma factor that is active in the stationary phase,  
279 which is consistent with the transcriptional pattern of AscarD, suggesting that the transcription of  
280 *ascarD* is controlled by SigF. To verify this hypothesis, we examined the transcriptional level of  
281 *ascarD* in a *sigF* mutant ( $\Delta sigF$ ). As shown in Figure 4D, only a very low AscarD transcriptional  
282 level could be detected in the  $\Delta sigF$  strain in the MEP, and transition to the MSP could not induce  
283 it either. These data indicate that the expression of *ascarD* is regulated by SigF.

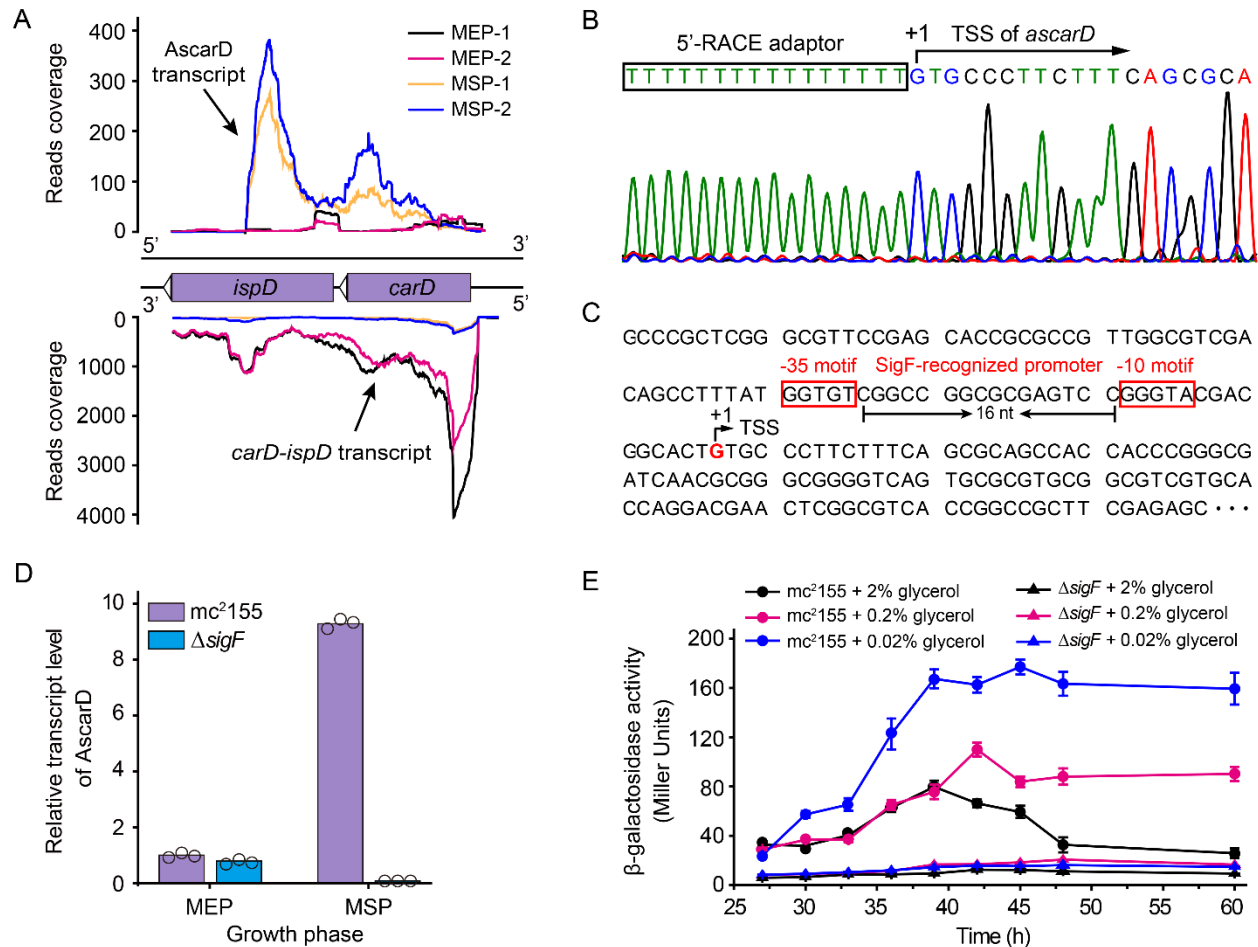

284  
285 **Figure 4. Identification and characterization of AscarD.** **A**, transcriptional landscapes of *carD-ispD* transcript  
286 and AscarD. Red and black lines represent exponential-phase cells, blue and green lines are from stationary-  
287 phase cells. Extensions of -1 and -2 represent two biological replicates. **B**, mapping of the transcriptional start  
288 site (TSS) of AscarD. The lower four-color chromatogram shows the results of Sanger sequencing, the  
289 corresponding DNA sequence is displayed on the upper layer. The 5'-RACE adaptor sequence is framed by a  
290 black rectangle, and TSS is indicated by a black arrow. **C**, potential SigF-recognized -10 and -35 motifs upstream  
291 of the identified TSS are indicated with red rectangles. **D**, AscarD transcript levels at different growth phases of  
292 mc<sup>2</sup>155 and  $\Delta$ *sigF* strains were measured by qRT-PCR, normalized to *sigA* transcript levels, and expressed as  
293 fold change compared to levels of mc<sup>2</sup>155 cells at mid-exponential phase (MEP). Individual data for the three  
294 biological replicates are shown in the corresponding columns. **E**, promoter activities of *ascarD* in mc<sup>2</sup>155 and  
295  $\Delta$ *sigF* strains carrying a  $\beta$ -galactosidase-encoding reporter plasmid. Error bars indicate the standard deviation of  
296 three biological replicates.

297 Figure 4 includes the following figure supplement:

298 **Figure supplement 1.** RT-PCR analysis of the transcriptional levels of *ascarD* and *carD*.

299

300 Further, since *ascarD* was highly expressed during the stationary phase, we speculated that  
301 transcription of *ascarD* could be also subject to carbon starvation. To verify this idea, we carried  
302 out *lacZ* reporter assays to examine the *ascarD* promoter activity under different carbon source  
303 (glycerol) concentrations. As shown in Figure 4E, the *ascarD* promoter activity gradually increased  
304 as the glycerol concentrations decreased. This indicates that *ascarD* could indeed be induced under  
305 carbon starvation conditions; however, in the  $\Delta sigF$  strain, the expression of *ascarD* did not  
306 respond to the glycerol concentration (Figure 4E). This indicates that the response of *ascarD* to  
307 low carbon requires the presence of SigF, which is consistent with the above results. Thus, we  
308 confirm that the transcription of *ascarD* was highly induced in response to starvation in a SigF-  
309 dependent manner.

### 310 **AscarD inhibits biosynthesis of CarD protein**

311 Expression of AscarD was highly induced in response to starvation, while the CarD protein level  
312 was sharply reduced, suggesting that AscarD could be involved in regulating *carD* expression. To  
313 clarify this issue, we carried out *lacZ* reporter assays. The -213 – +1090 region, containing the  
314 promoter, 5'-UTR, and CDS of *carD* and the promoter of *ascarD* on the antisense strand, was  
315 translationally fused to *lacZ* to construct the PUCP plasmid (Figure 5A), in which the expression  
316 of the *carD-lacZ* chimeric transcript was expected to be regulated by the *cis*-encoded AscarD.  
317 However, in the PUCP<sub>mut</sub> plasmid, the -10 motif of *ascarD* is mutated (GGGTAC is mutated to  
318 GGGCGC) and could not transcribe AscarD, so the expression of the *carD-lacZ* transcript will not  
319 be affected by this antisense RNA. We then transformed the two plasmids into mc<sup>2</sup>155 cells and  
320 measured their  $\beta$ -galactosidase activities. As shown in Figure 5B, mycobacterial cells transformed  
321 with the PUCP<sub>mut</sub> plasmid exhibited higher  $\beta$ -galactosidase activity than those with the PUCP  
322 plasmid. This result indicates that AscarD repressed the expression of *carD-lacZ* transcript, and  
323 blocking the transcription of *ascarD* derepressed this regulation.

324 To further explore the regulatory role of AscarD on *carD* expression, we overexpressed *ascarD*  
325 on a multiple-copy plasmid to construct *ascarD* high-expressing strain (*ascarD*<sub>OE</sub>) and knockdown  
326 the transcription of *ascarD* to construct the *ascarD* low-expressing strain (*ascarD*<sub>KD</sub>, Figure 5–  
327 figure supplement 1A and B) and examined the changes of CarD protein levels in these strains. As  
328 shown in Figure 5C, compared to the control strain, the CarD level in the *ascarD*<sub>OE</sub> strain was  
329 reduced, while in the *ascarD*<sub>KD</sub> strain it was significantly increased. This result indicates that



330 *AscarD* inhibits the synthesis of *CarD*, which is consistent with the *lacZ* reporter assay data  
331 described above.

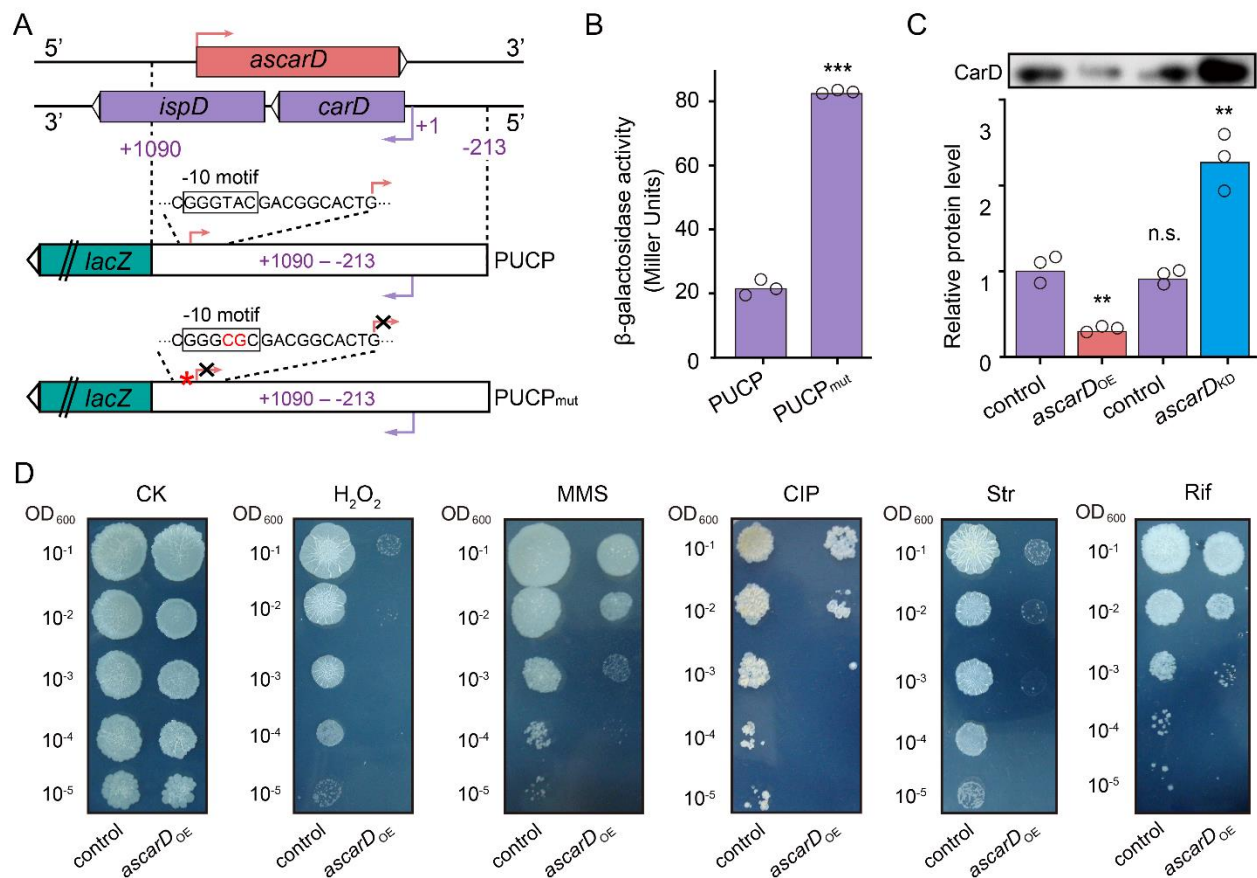

332  
333 **Figure 5. *AscarD* negatively regulates *carD*.** **A**, a schematic diagram of PUCP and PUCP<sub>mut</sub> plasmids  
334 construction (see a detailed description in Experimental Section). **B**,  $\beta$ -galactosidase activities of mc<sup>2</sup>155 strains  
335 transformed with PUCP or PUCP<sub>mut</sub> plasmid. Individual data for the three biological replicates are shown in the  
336 corresponding columns. **C**, *CarD* protein levels in different strains. Mycobacterial cells were harvested at the  
337 MSP. The upper part shows the Western blot with *CarD* levels, the histogram below it shows the quantitative  
338 statistics of Western blot results. **D**, The tolerance of *ascarD*<sup>OE</sup> and control strains to oxidative stress, DNA  
339 damage, and antibiotic stimulation, respectively. Serially diluted bacterial suspensions were separately spotted  
340 onto normal 7H10 plate (CK) or plates containing 0.3 mM H<sub>2</sub>O<sub>2</sub>, 0.05% methanesulfonate (MMS), 0.2  $\mu$ g/mL  
341 of ciprofloxacin (CIP), 0.1  $\mu$ g/mL of streptomycin (Str), or 5  $\mu$ g/mL of rifamycin (Rif) respectively.

342 Figure 5 includes the following figure supplement:

343 **Figure supplement 1.** The expression levels of *carD* and *ascarD* in different strains.

344



345 In addition, previous studies showed that CarD-impaired mycobacterial cells are more sensitive  
346 to oxidative stress, DNA damage, and the effect of some antibiotics (Garner et al., 2014; Stallings  
347 et al., 2009; Weiss et al., 2012). To further investigate the effect of AscarD on CarD expression  
348 and its biological function, we examined the tolerance of AscarD overexpression strain to the  
349 above-mentioned stresses. The results showed that overexpression of AscarD significantly  
350 enhanced the sensitivity of mycobacterial cells to these stresses (Figure 5D). This result is  
351 consistent with the experimental data described above, allowing us to conclude that AscarD, when  
352 fully induced, significantly inhibits the expression of CarD and affects its function.

353 It is important to point out that the inhibitory effect of antisense RNA on target genes can occur  
354 at the post-transcriptional level (reducing transcript stability) and/or the translational level  
355 (inhibiting the transcript translation) (Georg and Hess, 2011). To determine the inhibition mode,  
356 we measured the transcript level of *carD* in the *ascarD*<sub>OE</sub> strain. The *carD* transcript levels were  
357 significantly higher in the *ascarD*<sub>OE</sub> strain than those in the control strain (Figure 5–figure  
358 supplement 1C), illustrating that overexpressed AscarD increases, rather than decreases, the  
359 stability of *carD* transcripts. Since AscarD only reduces the CarD protein level, but not the  
360 transcript level, we speculated that AscarD inhibits *carD* expression at the translational level.

361 Under starvation conditions, AscarD was highly induced to inhibit CarD protein synthesis. Since  
362 CarD protein levels are not only reduced during nutrient starvation, but also reduced under hypoxic  
363 and acidic conditions, we wanted to know whether *ascarD* is also induced under such stress  
364 conditions. To address this question, we monitored the RNA level of AscarD under the two stress  
365 conditions by qRT-PCR. The results showed that the AscarD level increased by 4.5 and 2.3 times  
366 in response to hypoxia and acid stress, respectively. These data indicate that AscarD was up-  
367 regulated in response to a variety of stimuli to inhibit the protein synthesis of CarD and help  
368 bacteria adapt to the stress environment.

### 369 **AscarD and Clp protease co-regulate CarD-mediated mycobacterial adaptive response**

370 AscarD and Clp protease regulate CarD at different levels. To explore which of these two  
371 regulations is dominant and whether there is a synergistic effect between the two, we examined the  
372 changes in CarD levels and bacterial survival rates in different mutant strains. As mentioned earlier,  
373 deletion of the “AAAS” motif blocked the degradation of CarD by Clp protease. To block the

374 regulation of CarD by AscarD, we mutated the promoter of *ascarD* in *M. smegmatis* genome and  
375 constructed a mutant strain, referred as AsM. In addition, to block the regulation of CarD by both  
376 AscarD and Clp protease, we also constructed a double mutant strain AsM/AAAS\_del with a  
377 mutation in the promoter of *ascarD* and the deletion of the “AAAS” motif of CarD. Next, we  
378 investigated the changes in CarD levels and bacterial survival of these strains under stress  
379 conditions. The Western blot results showed that, compared to the wild-type strain, CarD levels in  
380 the AsM strain slightly increased, while CarD levels in the AAAS\_del strain increased significantly  
381 (Figure 6A). This indicates that under these stress conditions tested, Clp protease dominates the  
382 regulation of CarD levels.

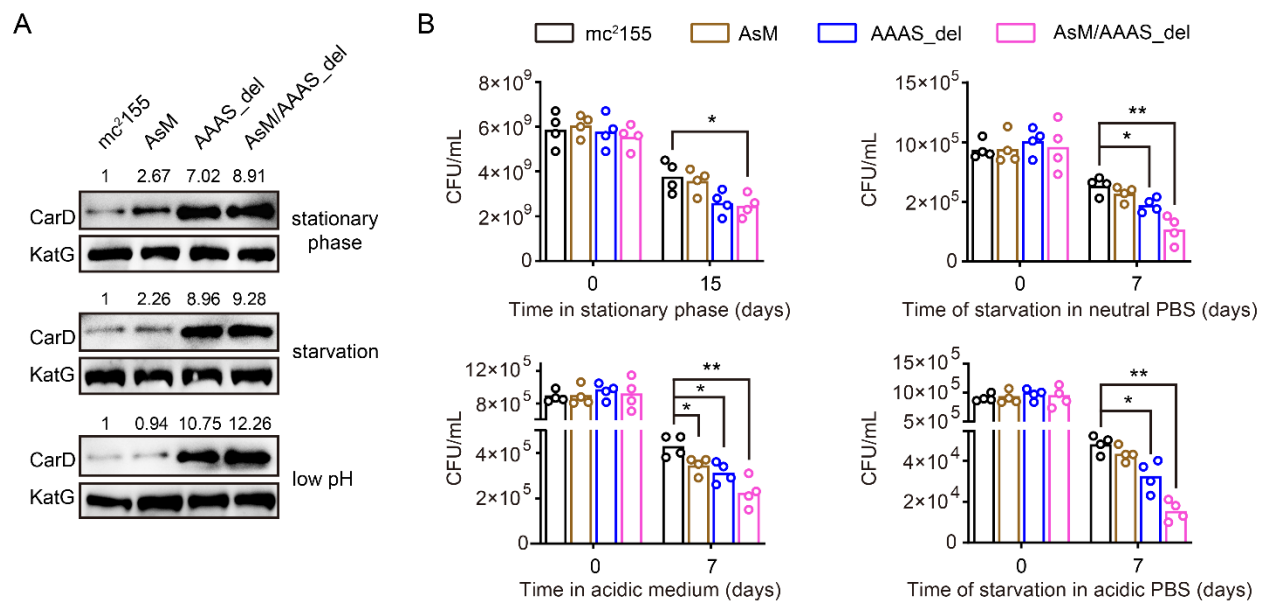

383  
384 **Figure 6. AscarD and Clp protease co-regulate CarD-mediated mycobacterial adaptive response. A,**  
385 **Changes in CarD protein levels of different strains under various stress conditions. AsM, AAAS\_del, and**  
386 **AsM/AAAS\_del represent, respectively, AscarD promoter mutant, AAAS motif deletion, and double mutant**  
387 **strains. B, Survival of different mycobacterial cells under various stress conditions. Statistical test was done using**  
388 **the Student's t-test, with \* indicating p-value <0.05, and \*\* indicating p-value <0.01.**

389  
390 While bacterial survival assays showed that relieving the regulation of AscarD on CarD had a  
391 weak impact on the survival of mycobacterial cells, relieving the regulation of Clp protease on  
392 CarD had a moderate impact, and relieving both regulatory mechanisms strongly affected the  
393 survival of mycobacterial cells (Figure 6B). These results indicate that AscarD and Clp protease

394 are both important for the survival of mycobacterial cells under stress conditions. While Clp  
395 protease is responsible for the rapid reduction of CarD protein levels, AscarD further reduces CarD  
396 protein levels by inhibiting *carD* translation. Their combined action helps mycobacterial cells save  
397 energy in the stress conditions by preventing the futile cycle of CarD synthesis and its degradation  
398 by Clp protease. Moreover, AscarD could prevent mycobacterial cells from over-accumulating  
399 CarD in the absence of the expression of Clp protease, which is essential for their survival under  
400 stress conditions. Altogether, AscarD and Clp protease work synergistically to decrease the CarD  
401 level to help mycobacterial cells respond to various stresses.

402

## 403 **Discussion**

404 In this paper, we present an in-depth study on the regulation of CarD expression and demonstrate  
405 that CarD is co-regulated by both AscarD antisense RNA and Clp protease under starvation  
406 conditions. Based on these results, along with those published by others, we propose a new  
407 mechanism for mycobacterial adaption to the starvation conditions, namely, that mycobacterial  
408 cells adjust their transcriptional and translational rates by regulating the CarD levels in response to  
409 the environmental conditions (Figure 7).

410 Under abundant nutrition, mycobacterial cells use CarD to stabilize RPo (Bae et al., 2015; Davis  
411 et al., 2015; Rammohan et al., 2016; Rammohan et al., 2015), promoting the transcription of rRNA  
412 and other related genes (Garner et al., 2014; Rammohan et al., 2016; Srivastava et al., 2013) to  
413 ensure vigorous cell growth (Figure 7 left). However, when external nutrition gets scarce, SigF-  
414 regulated expression of AscarD is induced and it hybridizes with *carD* mRNA to prevent the  
415 translation of CarD protein (Figure 4 and 5). Meanwhile, the residual CarD protein is effectively  
416 degraded by the Clp complex to keep CarD at a very low level (Figure 1, 2, 3), which potentially  
417 reduces the stability of RPo and diminishes the synthesis of rRNA; these processes combine to  
418 slow down the rate of transcription and translation in mycobacterial cells (Figure 7 right). When  
419 nutrients are available, AscarD transcription is inhibited and *carD* mRNA gets translated to resume  
420 the normal CarD level and ensure the re-growth of mycobacterial cells (Figure 1F). Overall, these  
421 findings contribute to a better understanding of the mechanisms of mycobacterial adaptation to  
422 starvation and provide certain clues that might help in the treatment of tuberculosis.

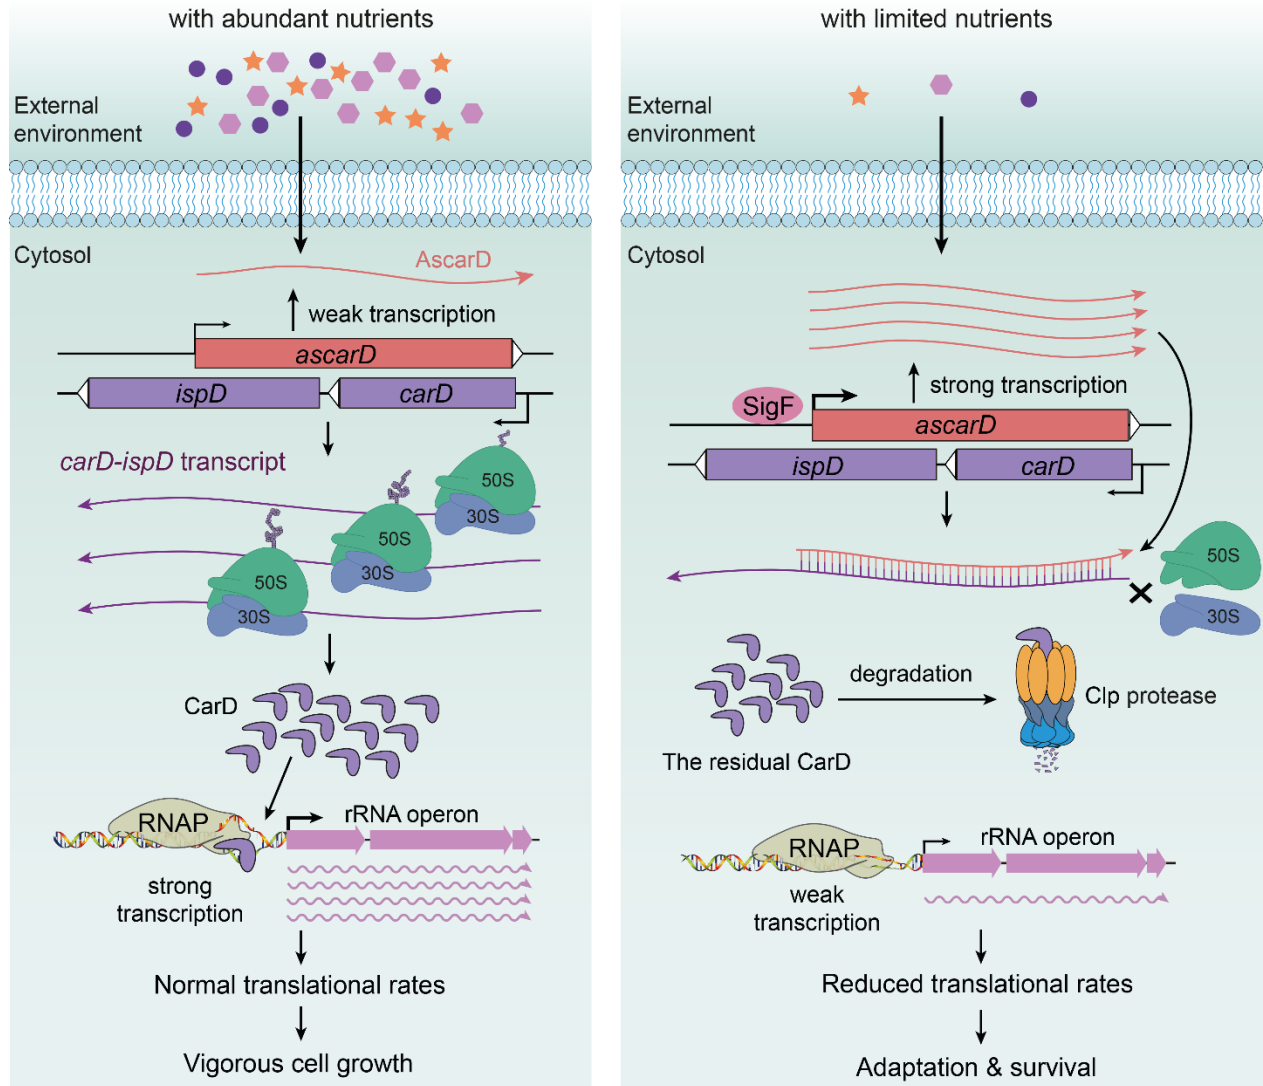

423  
424 **Figure 7. AscarD and Clp protease work together to regulate CarD-mediated starvation response.** The left  
425 and right panels represent the mycobacterial cells under nutrient-rich and nutrient-starved conditions,  
426 respectively.

427 Figure 7 includes the following figure supplement:

428 **Figure supplement 1.** Alignment of mycobacterial *carD* promoter sequences.

429  
430 **Mycobacterial CarD defines a distinct adaptive response mechanism**  
431 Before this work, the best-known starvation response mechanism in *Mycobacterium* was the  
432 stringent response mediated by (p)ppGpp. Yet, its detailed mechanism is still not entirely clear  
433 today, although it is considered similar to the well-characterized stringent response mechanisms

434 reported in *E. coli* and *B. subtilis* (China et al., 2012; Prusa et al., 2018; Weiss and Stallings, 2013).  
435 In *E. coli*, (p)ppGpp is synthesized in large quantities in response to starvation and directly interacts  
436 with RNAP to destabilize the RPo formed on rRNA genes and consequently reduces the rRNA  
437 synthesis (Gourse et al., 2018). However, (p)ppGpp in *B. subtilis* does not directly interact with  
438 RNAP but instead decreases the intracellular GTP content to destabilize the RPo formed on the  
439 genes that start from guanine, such as the rRNA genes (Kriel et al., 2012; Tojo et al., 2010). In  
440 mycobacteria, the exact effect and role of ppGpp on rRNA transcription is unclear, but (p)ppGpp  
441 likely inhibits the transcription of mycobacterial rRNA by affecting the stability of RPo (Prusa et  
442 al., 2018), which is similar to the CarD-mediated starvation response. Of course, these two  
443 mechanisms also have their unique features. First, (p)ppGpp reduces the stability of RPo (China et  
444 al., 2012; Tare et al., 2013), while CarD enhances its stability (Bae et al., 2015; Davis et al., 2015;  
445 Rammohan et al., 2016; Rammohan et al., 2015). Second, (p)ppGpp is rapidly synthesized in  
446 response to starvation, while CarD is quickly degraded under starvation conditions. Despite the  
447 differences between the two mechanisms, they basically work in the same way and ultimately help  
448 the mycobacterial cells adapt to starvation by reducing the rRNA synthesis. It should be noted that  
449 Stallings and colleagues previously reported that CarD is required for stringent response in *M.*  
450 *smegmatis* (Stallings et al., 2009). However, our data showed that CarD is effectively degraded  
451 under starvation conditions where stringent response usually occurs. This may seem to contradict  
452 the previous study, but since both CarD and (p)ppGpp interact with RNAP (Gourse et al., 2018;  
453 Stallings et al., 2009), the two molecules might have complex effects on RNAP that remain to be  
454 disentangled.

455 In addition, our study found that mycobacterial cells reduce CarD levels in response to hypoxic  
456 conditions. By analyzing the RNA-seq data for *M. tuberculosis* (Zhu et al., 2019), we found that  
457 18 of the top 20 up-regulated genes (Supplementary File 1) in CarD<sup>K125A</sup> strain (a mutant with  
458 predicted weakened affinity of CarD to DNA) belong to the previously identified dormancy  
459 regulon (Voskuil et al., 2003), and 31 out of 48 dormancy regulon genes are significantly up-  
460 regulated. These data indicate that CarD represses the expression of dormancy regulon genes, and  
461 the reduction of CarD level during starvation or hypoxia may derepress these genes and facilitate  
462 mycobacterial dormancy. Since pathogenic mycobacteria usually live in a nutrient-deprived and  
463 hypoxic environment after infecting the host, we believe that CarD plays an important role in the

464 dormancy and persistence of pathogenic mycobacteria in the host cells. Taken together, the CarD-  
465 mediated mycobacterial adaptive response mechanism is multi-faceted; reduction of CarD not only  
466 down-regulates the transcription of rRNA to help mycobacterial cells adapt to nutritional starvation,  
467 but also enhances the expression of dormancy regulon genes to help pathogenic mycobacteria  
468 entering into a dormant state.

#### 469 **Efficient degradation of CarD during the stationary phase**

470 The efficient degradation of CarD in the stationary phase may be caused by the increased  
471 expression of ClpC1. Notably, the increase in ClpC1 level during the stationary phase is also  
472 observed in *Mycobacterium avium* (Enany et al., 2021), and the content of ClpC or other AAA<sup>+</sup>  
473 unfoldases (ClpA, ClpX, etc.) in many bacteria also increases significantly during the stationary  
474 phase (Chaussee et al., 2008; Cohen et al., 2006; Laakso et al., 2011; Michel et al., 2006; Sowell  
475 et al., 2008). This indicates that up-regulation of Clp protease may be a conserved regulatory  
476 mechanism for bacteria to cope with starvation stress. Additionally, Schmitz and Sauer (2014)  
477 previously suggested that binding of an AAA<sup>+</sup> unfoldase strongly stimulates the peptidase activity  
478 of ClpP1P2 and stabilizes the conformation of the active complex. Therefore, the increased ClpC1  
479 level during the stationary phase not only accelerates the unfolding of CarD, but also enhances the  
480 proteolytic activity of ClpP1P2, which ultimately mediates the effective degradation of CarD.

481 Considering the complexity of intracellular regulation, we speculate that there may be other  
482 reasons for the efficient degradation of CarD during the stationary phase. First, in the exponential  
483 phase, CarD may be protected by a certain protein complex. Garner et al. previously suggested that  
484 CarD-RNAP interaction protects CarD from proteolytic degradation (Garner et al., 2017).  
485 Therefore, RNAP (or other proteins) may protect CarD in the exponential phase. Then, after the  
486 mycobacterial cells enter the stationary phase, CarD would be detached from RNAP (or other  
487 proteins) through unknown mechanisms and be effectively degraded by Clp protease. Second,  
488 besides Clp protease, degradation of CarD may require an adaptor protein. For example, in  
489 *Caulobacter crescentus*, CpdR directly controls PdeA degradation by acting as a phosphorylation-  
490 dependent adaptor protein for the ClpXP protease (Abel et al., 2011). We speculate that there is  
491 possibly an adaptor protein that recognizes CarD under the starvation condition and delivers it to  
492 the Clp protease for degradation. Third, degradation of CarD by Clp protease may be affected by  
493 its modification. For example, certain protein substrates in *B. subtilis* are degraded by Clp protease



494 only after their arginine residues are phosphorylated (Trentini et al., 2016). CarD might undergo a  
495 similar structural modification under the starvation condition, which is specifically recognized and  
496 degraded by Clp protease.

#### 497 **Role of AscarD in inhibition of the synthesis of CarD protein**

498 The inhibitory effect of antisense RNAs on target genes generally occurs at the post-  
499 transcriptional level and/or the translational level (Georg and Hess, 2011). At the translation level,  
500 antisense RNAs mainly regulate the initiation of translation by blocking the SD sequence or  
501 adjacent regions of the target mRNA (Georg and Hess, 2018; Saberi et al., 2016; Sesto et al., 2013).  
502 In this study, we found that AscarD inhibited the synthesis of CarD protein but at the same time  
503 increased the stability of *carD* mRNA. Therefore, we speculated that the inhibition of CarD protein  
504 synthesis by AscarD is likely to occur at the translation level. So how does AscarD inhibit *carD*  
505 mRNA translation? Does its 3'-end cover the SD sequence of *carD* mRNA? It should be noted that  
506 we failed to identify the 3'-end of AscarD through 3'-RACE, but some of our results showed that  
507 AscarD does extend to the region that blocks the SD sequence of *carD* mRNA. We think this may  
508 be the main way that AscarD affects CarD protein synthesis. Of course, in addition to inhibiting  
509 the translation of *carD* mRNA, AscarD may also affect the synthesis of CarD protein in other ways.  
510 For example, transcription and translation in mycobacteria appear to be coupled (Johnson et al.,  
511 2020), such that the lead ribosome potentially contacts RNAP and forms a supramolecular complex.  
512 Therefore, a head-on RNAP on the antisense strand may become an obstacle to the RNAP on the  
513 sense strand and the trailing ribosomes, which may affect the synthesis of CarD protein.

514 Clp protease degrades CarD at the post-translational level, while AscarD inhibits CarD synthesis  
515 at the translational level. This two-tier mechanism allows mycobacterial cells to tightly control the  
516 CarD level. For example, when the content of Clp is insufficient or its function is lost, CarD may  
517 not be efficiently degraded; in that case, AscarD could prevent over-accumulation of CarD by  
518 inhibiting its synthesis. In fact, Clp protease is responsible for degrading unfolded/misfolded  
519 proteins that accumulate during stress conditions (LaBreck et al., 2017) and contributes to the  
520 clearance of truncated peptides from stalled ribosomes (Gottesman et al., 1998). The amount of  
521 these "competitive substrates" increases under stress, e.g., at high temperatures (Fujihara et al.,  
522 2002), which may result in the insufficient degradation of CarD by Clp protease. Furthermore,  
523 some natural compounds have been reported to inhibit the activity of Clp protease (Moreno-Cinos



524 et al., 2019; Raju et al., 2012), suggesting that mycobacterial cells may face reduced or lost activity  
525 of Clp during *in vitro* growth or after infection of the host. In such situations, AscarD would be  
526 particularly important. Additionally, the presence of AscarD also helps mycobacterial cells save  
527 energy by preventing the futile cycle of CarD synthesis in the starvation condition and its  
528 degradation by Clp protease, which may be harmful to mycobacterial survival. Taken together, our  
529 data show that AscarD works together with Clp protease to maintain CarD at the minimal level to  
530 help mycobacterial cells cope with the nutritional stress.

### 531 **Regulation of *carD* at the transcriptional level**

532 Previous reports showed that the transcription of *carD* is regulated by SigB, but *carD* can still  
533 be effectively transcribed in the *sigB* knockout strain (Hurst-Hess et al., 2019). Since the -10  
534 elements recognized by SigA and SigB are somewhat similar in mycobacteria, we speculate that  
535 SigA and SigB jointly regulate the *carD* expression, with SigA as the primary  $\sigma$ -factor responsible  
536 for the basal transcription of *carD*, and SigB as an alternative  $\sigma$ -factor responsible for the  
537 stimulated transcription of *carD* under stress conditions, which may also be the reason for the  
538 increasing *carD* expression after treatment with DNA-damaging agents (Figure 1A, B).

539 In addition, in *Rhodobacter*, CarD negatively regulates its own promoter, and the negative effect  
540 mainly depends on the extended -10 element (TGN) and the adjacent spacer of the promoter (Henry  
541 et al., 2021). At present, it is unclear whether mycobacterial CarD is autoregulated. After analyzing  
542 *carD* promoters from 91 different mycobacterial species, we found that mycobacterial *carD* also  
543 contains a conserved extended -10 element (Figure 7–figure supplement 1). Considering that only  
544 a few “TANNNT” motifs in mycobacteria are preceded with extended -10 element (Cortes et al.,  
545 2013; Henry et al., 2020), we speculate that the highly conserved extended -10 element in the *carD*  
546 promoter may play an important role in the maintaining and regulating its basal activity. Moreover,  
547 a specific feature (T-rich) in the spacer immediately upstream of the extended -10 element  
548 contributes greatly to the autoregulation of *Rhodobacter* CarD. In *Mycobacterium*, there is no  
549 similar spacer, but there is a highly conserved dinucleotide "CG" immediately upstream of the  
550 extended -10 element (Figure 7–figure supplement 1). Based on this limited information, it is  
551 difficult to determine whether mycobacterial CarD is autoregulated. In addition, it is worth  
552 mentioning that there are two conserved regions upstream of the *carD* core promoter regions  
553 (Figure 7–figure supplement 1). We speculate that these sequences may play a role in regulating

554 the expression of *carD*, but to our knowledge, no potential transcription factor that can bind to  
555 these two sequences has been identified. Future studies to explore the function of these conserved  
556 elements will help to fully elucidate the regulatory mechanism of CarD.

## 557 **Materials and Methods**

### 558 **Bacterial strains and growth condition**

559 *E. coli* strains were cultivated in lysogeny broth (LB) medium at 37°C. *M. smegmatis* mc<sup>2</sup>155 wild-  
560 type strain (Yang et al., 2012) and its derivatives were grown at 37°C in Middlebrook 7H9 medium  
561 supplemented with 0.5% (v/v) glycerol and 0.05% (v/v) Tween 80, or on Middlebrook 7H10 agar  
562 supplemented with 0.5% (v/v) glycerol. *M. bovis* BCG and *M. tuberculosis* H37Ra strains (Yang  
563 et al., 2018) were grown at 37°C in 7H9 medium supplemented with 0.5% glycerol, 0.05% Tween  
564 80 and 10% OADC (oleic acid, albumin, dextrose, and catalase), or on Middlebrook 7H11 agar  
565 supplemented with 0.5% glycerol and 10% OADC. When required, antibiotics were added at the  
566 following concentrations: kanamycin (Kan), 25 µg/mL; hygromycin (Hyg), 50 µg/mL;  
567 streptomycin (Str), 10 µg/mL. The strains used in this study are listed in Supplementary File 2.

568 Hartmans-de Bont (HDB) minimal medium, prepared according to reference (Smeulders et al.,  
569 1999), was used for starvation experiments. Briefly, 1 L of HDB medium contained: 10 mg of  
570 EDTA, 100 mg of MgCl<sub>2</sub>·6H<sub>2</sub>O, 1 mg of CaCl<sub>2</sub>·2H<sub>2</sub>O, 0.2 mg of NaMoO<sub>4</sub>·2H<sub>2</sub>O, 0.4 mg of  
571 CoCl<sub>2</sub>·6H<sub>2</sub>O, 1 mg of MnCl<sub>2</sub>·2H<sub>2</sub>O, 2 mg of ZnSO<sub>4</sub>·7H<sub>2</sub>O, 5 mg of FeSO<sub>4</sub>·7H<sub>2</sub>O, 0.2 mg of  
572 CuSO<sub>4</sub>·5H<sub>2</sub>O, 1.55 g of K<sub>2</sub>HPO<sub>4</sub>, 0.85 g of NaH<sub>2</sub>PO<sub>4</sub>, 2.0 g of (NH<sub>4</sub>)<sub>2</sub>SO<sub>4</sub>, 0.2% glycerol (v/v), and  
573 0.05% Tween 80 (v/v). For the carbon starvation experiment, glycerol was removed; for the  
574 nitrogen starvation experiment, (NH<sub>4</sub>)<sub>2</sub>SO<sub>4</sub> was removed; for the phosphorus starvation experiment,  
575 both K<sub>2</sub>HPO<sub>4</sub> and NaH<sub>2</sub>PO<sub>4</sub> were removed, while 50 mM 3-(N-morpholino) propanesulfonic acid  
576 (MOPS) was added to replace lost buffering capacity.

### 577 **Stimulation and starvation experiments**

578 Mycobacterial cells were first grown to mid-exponential phase (MEP) in the normal 7H9 medium.  
579 For genotoxic reagent stimulation experiments, 10 mM H<sub>2</sub>O<sub>2</sub>, 0.1% methyl methanesulfonate  
580 (MMS), and 10 µg/mL of ciprofloxacin (CIP) were separately added to the MEP mc<sup>2</sup>155 culture  
581 and maintained in roller bottle culture for additional 4 h. For the PBS starvation experiment, the  
582 MEP mc<sup>2</sup>155 cells were harvested, resuspended in PBS supplemented with 0.05% Tween 80, and

583 maintained in roller bottle culture for 4 h. For the carbon-, nitrogen-, and phosphorus-starvation  
584 experiments, harvested MEP cells were resuspended in the HDB medium with carbon, nitrogen, or  
585 phosphorus removed, respectively, and maintained in roller bottle culture for 4 h for the mc<sup>2</sup>155  
586 cells, or 24 h for the BCG and H37Ra cells. For the nutrient supplemented experiments, the above-  
587 mentioned starved cultures were supplemented with the corresponding nutrients and maintained in  
588 roller bottle culture for additional 4 h for the mc<sup>2</sup>155 cells, or 24 h for the BCG and H37Ra cells.  
589 For the acid stimulation experiments, the harvested MEP cells were resuspended in the HDB  
590 medium with a low pH value (pH 4.5) and maintained in roller bottle culture for 4 h for the mc<sup>2</sup>155  
591 cells, or 24 h for the BCG and H37Ra cells.

592 For anaerobic experiments, the modified Wayne model (Wayne and Hayes, 1996) was used.  
593 Briefly, 150 mL standard serum bottles containing 100 mL of 7H9 medium were used, in which  
594 methylene blue was added to the final concentration of 2 µg/mL to indicate oxygen content. The  
595 harvested MEP cells were re-inoculated into the above serum bottles to make the final OD<sub>600</sub> of  
596 0.02. Then, the serum bottles were sealed with butyl rubber stoppers, closed tightly with screwcaps,  
597 and incubated at 37°C with shaking. The mc<sup>2</sup>155 cells were harvested 10 h after the blue color  
598 disappeared completely, and the BCG and H37Ra cells were harvested 48 h after the blue color  
599 completely disappeared. For the re-aeration experiments, the above-mentioned anaerobic cultures  
600 were transferred to roller bottles and harvested after the mycobacterial cells regrow.

### 601 **RNA isolation, reverse transcription and qRT-PCR**

602 The total RNA was extracted by the TRIzol method using mycobacterial cells equivalent to 30  
603 OD<sub>600</sub> (e.g., 30 mL of a culture with OD<sub>600</sub> of 1), as described previously (Li et al., 2017). The  
604 quality and concentration of total RNA were analyzed by NanoDrop 2000 (Thermo Scientific,  
605 USA). For reverse transcription, the total RNA was treated with DNase I (Takara Biotechnology,  
606 Japan) to remove any DNA contamination. The first-strand cDNA was synthesized using reverse  
607 transcriptase from the PrimeScript RT reagent kit (Takara Biotechnology, Japan) according to the  
608 manufacturer's instructions. The cDNA of *carD* or *ascarD* was synthesized using gene-specific  
609 primers RT-*carD*-R or RT-*ascarD*-R instead of random primers, which allowed us to distinguish  
610 between the two transcripts. For qRT-PCR, the reaction was performed in ABI 7500 (Applied  
611 Biosystems, USA) under the following conditions: 95°C for 10 s, 60°C for 10 s, and 72°C for 10 s  
612 for 40 cycles. Relative quantification of gene expression was performed by the 2<sup>-ΔΔCT</sup> method

613 (Livak and Schmittgen, 2001). *sigA* was used as a reference gene for the determination of relative  
614 expression. The primers used in this study are listed in Supplementary File 3.

### 615 **Construction of the *ascrD* and *carD* overexpression strains**

616 The overexpression plasmids of *ascrD* and *carD* were constructed based on the multi-copy  
617 plasmid pMV261. For *ascrD* overexpression, we cloned the *ascrD* promoter and coding region  
618 into the pMV261 vector between the *Xba* I and *Hind* III restriction sites. For *carD* overexpression,  
619 we cloned the coding sequence into pMV261 between the *EcoR* I and *EcoR* V restriction sites,  
620 which allowed *carD* to be transcribed from the *hsp60* promoter on the vector. The overexpression  
621 plasmids were then transformed into mc<sup>2</sup>155 cells to obtain the overexpression strains. The primers  
622 used are listed in Supplementary File 3.

### 623 **CRISPRi-mediated gene knockdown strategy**

624 CRISPR/dCas9-mediated gene knockdown strategy (Singh et al., 2016) was carried out to  
625 construct the *AscarD*<sub>KD</sub> strain. Briefly, pRH2502 plasmid containing *int* and *dcas9* genes was  
626 integrated into the mc<sup>2</sup>155 genome to generate Ms/pRH2502 strain (Supplementary File 2).  
627 pRH2521 plasmid containing the small guide RNA (sgRNA) targeting *ascrD* was transformed  
628 into Ms/pRH2502 strain to obtain the final *AscarD*<sub>KD</sub> strain (Supplementary File 2). The expression  
629 of both *dcas9* and sgRNA requires the induction by anhydrotetracycline (ATc). The transcription  
630 of the target gene (*ascrD*) was inhibited with the induction by 50 ng/mL of ATc, and the inhibition  
631 efficiency was assessed by qRT-PCR. It is worth noting that dCas9:sgRNA complex exhibits a  
632 strong inhibitory effect on the expression of a gene after it combines with the coding strand of the  
633 gene, but almost does not affect the expression of the gene when it combines with the template  
634 strand. The sgRNA we designed is combined with the coding strand of *ascrD* (that is, the template  
635 strand of *ispD*), so it has a strong inhibitory effect on the transcription of *ascrD* (reduced  $18.8 \pm$   
636  $2.6$  times as quantitated by qRT-PCR) but has almost no effect on the transcription of *ispD*. The  
637 inhibition efficiency is shown in Figure 5—figure supplement 1A and B, and all related primers are  
638 listed in Supplementary File 3.

### 639 **CRISPR/Cpf1-mediated mutagenesis**

640 CRISPR/Cpf1-mediated mutagenesis was carried out as described previously (Yan et al., 2017).  
641 For *clpP2* conditional mutant (*clpP2*CM) construction, an exogenous *clpP2* gene amplified with  
642 *clpP2*-F/R primer pair (Supplementary File 3) was ligated to the pRH2502 integration plasmid to

643 obtain pRH2502-*clpP2* recombinant plasmid, in which *clpP2* is under the control of ATc-inducible  
644 promoter P<sub>UV15tetO</sub>. The pRH2502-*clpP2* plasmid was then transformed and integrated into the  
645 mc<sup>2</sup>155 genome by *attB-attP* mediated site-specific recombination, to obtain Ms/pRH2502-*clpP2*  
646 strain. Finally, the endogenous *clpP2* gene on Ms/pRH2502-*clpP2* genome was mutated (pre-  
647 translational termination) using the CRISPR/Cpf1-mediated mutagenesis. Thus, *clpP2* could be  
648 expressed normally in the *clpP2*CM strain only upon the addition of 50 ng/mL ATc, but could not  
649 do so when ATc was absent. It should be noted that, in principle, the *clpP2*CM strain cannot grow  
650 in the 7H9 medium without ATc. But when we first cultivated the *clpP2*CM cells to exponential  
651 phase in ATc-containing 7H9 medium, then harvested the cells, washed them, and inoculated them  
652 into ATc-free 7H9 medium, *clpP2*CM cells can grow slowly.

### 653 **β-galactosidase experiment**

654 For PUCP construction, the -213 – +1090 region of *carD*, containing the *carD* promoter, 5'-UTR,  
655 *carD* CDS, and *ascarD* promoter on the antisense strand, was translationally fused to *lacZ*; for  
656 PUCP<sub>mut</sub> construction, the modified -213 – +1090 region of *carD*, containing the *carD* promoter,  
657 5'-UTR, *carD* CDS, and the mutated *ascarD* promoter (GGGTAC was mutated to GGGCGC) on  
658 the antisense strand, was translationally fused to *lacZ*. Then the two plasmids were transformed  
659 into the mc<sup>2</sup>155 strain to measure the β-galactosidase activity. The detailed steps for β-  
660 galactosidase activity determination were carried out according to references (Ali et al., 2017; Tang  
661 et al., 2014).

### 662 **5'-Rapid amplification of cDNA ends (5'-RACE)**

663 To identify the TSS of *ascarD*, 5'-RACE analysis was performed with RNA extracted from mc<sup>2</sup>155  
664 cells at mid-stationary phase grown in 7H9 medium. The 5'-RACE experiment was performed as  
665 described previously (Zaunbrecher et al., 2009). The primers used are listed in Supplementary File  
666 3.

### 667 **Western blot**

668 For internal reference in the Western blot experiments, we used SigA or KatG as indicated. In the  
669 stress stimulation experiments (Fig. 1B), SigA was used as an internal control because its level is  
670 not affected by the test stimuli. However, the SigA protein level in the stationary phase is  
671 significantly lower than that in the log phase (Gomez et al., 1998), so when we studied the protein  
672 levels in several growth phases, SigA was not used as an internal control. After many tests, we

673 found that the protein level of KatG remained basically unchanged throughout the growth stage, so  
674 KatG was used as an internal control in those experiments (Note: KatG is highly induced under  
675 oxidative stress conditions, so it was not suitable for use as an internal control in the stress  
676 stimulation experiments). CarD or KatG were detected using the CarD-specific or KatG-specific  
677 rabbit polyclonal antibodies prepared by Dia-An Biotech, Inc. (Wuhan, China). For SigA detection,  
678 His×6 tag was fused to the C-terminus of SigA by inserting its coding sequence immediately  
679 upstream of the *sigA* stop codon in the mc<sup>2</sup>155 genome, and the modified SigA-His×6 protein was  
680 detected using rabbit polyclonal antibody to His×6 (Yeasen Biotech Co., Shanghai, China). For  
681 Western blot assays, the amount of total protein loaded in each lane was the same, and the detailed  
682 procedures were as described previously (Hnasko and Hnasko, 2015). For quantification of  
683 Western blot results, Image J software was used. The intensities of bands in each lane were  
684 individually measured, and the intensities of the target protein were normalized with respect to  
685 their corresponding loading control. In each panel, the normalized value of the first sample was set  
686 to 1, and the values of other samples were represented by the fold changes of their normalized  
687 value relative to the first sample.

688

### 689 **Pull-down assay**

690 The His×6 tagged ClpC1 (ClpC1-His) and ClpX (ClpX-His) recombinant proteins were expressed  
691 and purified from *E. coli* BL21(DE3). After purification, the eluate containing ClpC1-His/ClpX-  
692 His protein was dialyzed overnight at 4°C, then incubated with 1 mM ATP for 1 h before loading  
693 onto the Ni-NTA resin. For pull-down assay, the resin-bound ClpC1-His or ClpX-His protein was  
694 separately incubated with lysate extracted from exponential mc<sup>2</sup>155 cells at room temperature for  
695 30 min. The resins were washed with 50 mM imidazole for 5 times and eluted with 500 mM  
696 imidazole. The eluents were subjected to immunoblot assay using the antibodies indicated.

### 697 **Bacterial survival assay**

698 For the stationary phase survival assay, mycobacterial cells were first grown to the stationary phase,  
699 followed by keeping at them 4°C, and the bacterial counts were performed on the 0<sup>th</sup> and 15<sup>th</sup> days  
700 thereafter. For stress survival assays, mycobacterial cells were first grown to the early-exponential  
701 phase (OD<sub>600</sub> ≈ 0.5) and then diluted 50-fold into acidic 7H9 medium (pH=4.5), neutral PBS  
702 (pH=7.0), or acidic PBS (pH=4.5). The dilutions were kept at 4°C, and the bacterial counts were



703 performed 0<sup>th</sup> and 7<sup>th</sup> days thereafter. For genotoxic stress survival assay, *ascarD*<sub>OE</sub> and control  
704 cells were grown to mid-exponential phase (OD<sub>600</sub>≈1.0), followed by diluting 10<sup>1</sup>, 10<sup>2</sup>, 10<sup>3</sup>, 10<sup>4</sup>,  
705 and 10<sup>5</sup> folds, respectively. Afterward, 3 μL of the bacterial suspension at each dilution level were  
706 separately spotted onto 7H10 plates containing either 0.3 mM H<sub>2</sub>O<sub>2</sub>, 0.05% MMS, 0.2 μg/mL of  
707 CIP, 0.15 μg/mL of Str, or 5 μg/mL of Rif, respectively. The plates were cultivated at 37°C for 3  
708 days.

### 709 **Statistical analysis**

710 Statistical testing was done using the Student's t-test (two-tailed), with \*\*\* indicating p-value  
711 <0.001, \*\* indicating p-value <0.01, \* indicating p-value <0.05, and n.s. indicating p-value >0.05.  
712 Error bars indicate standard deviation of three biological replicates (Biological replicates represent  
713 tests performed on different biological samples representing an identical time or treatment dose,  
714 while technical replicates represent multiple tests on the same sample).

715

### 716 **Acknowledgements**

717 This work was supported by the National Natural Science Foundation of China (grants 31770087,  
718 31900057, 31970074, and 32171424) and the China Postdoctoral Science Foundation (grant  
719 2019M662654). MYG was supported by the Intramural Research Program of the U.S. National  
720 Library of Medicine at the NIH.

721

### 722 **Author contributions**

723 Xinfeng Li, Fang Chen, Conceptualization, Investigation, Visualization, Methodology, Writing-  
724 original draft; Xiaoyu Liu, Jinfeng Xiao, Investigation, Methodology, Visualization; Binda T  
725 Andongma, Qing Tang, Xiaojian Cao, Formal analysis, Methodology; Shan-Ho Chou, Michael Y  
726 Galperin, Visualization, Writing-original draft, Writing-review and editing; Jin He,  
727 Conceptualization, Supervision, Funding acquisition, Project administration, Writing-review and  
728 editing

729

### 730 **Competing interests**

731 The authors declare that no conflict of interest is present.



## 732 **Figure supplement**

733 **Figure 1–figure supplement 1. Changes of *carD* levels in *M. smegmatis* under different**  
734 **conditions and different strains. A,** *carD* mRNA levels under different starvation conditions. CK  
735 represents untreated exponential cells; CL, NL, and PL represent exponential cells transferred into  
736 carbon-limiting, nitrogen-limiting, and phosphorus-limiting media for 4 h, respectively. Statistical  
737 analysis was done using Student's t-test, with \*\* indicating p-value <0.005, \*\*\* indicating p-value  
738 <0.001, and n.s. indicating p-value >0.05. Error bars indicate the standard deviation of three  
739 biological replicates. **B,** Schematic diagram for the construction of the *carD* overexpression  
740 plasmid. The coding sequence of *carD* was cloned into multiple-copy plasmid pMV261 between  
741 the *EcoR* I and *EcoR* V restriction sites, which allowed *carD* to be transcribed from the *hsp60*  
742 promoter on the plasmid. **C and D,** the mRNA and protein levels of *carD* in the control and *carD*  
743 overexpression strains (*carD*<sub>OE</sub>), respectively. The number on each band of the Western blot results  
744 represent their relative quantitative values, which are normalized with respect to their  
745 corresponding loading controls.

746 **Figure 2–figure supplement 1. Changes of CarD levels in *M. smegmatis* under host-like stress**  
747 **conditions. A,** CarD protein levels in mc<sup>2</sup>155 under different pH conditions. CK indicates the  
748 untreated exponential cells; pH 7.0 and pH 4.5 indicate the exponential cells transferred into the  
749 media with corresponding pH values for 4 h. **B,** CarD protein levels in mc<sup>2</sup>155 under different  
750 oxygen availability conditions. The number on each band of the Western blot results represent their  
751 relative quantitative values, which are normalized with respect to their corresponding loading  
752 controls.

753 **Figure 3–figure supplement 1. Schematic diagram for the construction of the *clpP2***  
754 **conditional mutant. A,** *clpP2* gene amplified with *clpP2*-F/R primer pair (Supplementary File 3)  
755 was ligated to the pRH2502 integration plasmid to obtain pRH2502-*clpP2* recombinant plasmid,  
756 in which *clpP2* is under the control of ATc-inducible promoter P<sub>UV15tetO</sub>. **B,** the pRH2502-*clpP2*  
757 plasmid was transformed and integrated into mc<sup>2</sup>155 genome by *attB*-*attP* mediated site-specific  
758 recombination, to obtain Ms/pRH2502-*clpP2* strain. **C,** CRISPR/Cpf1-mediated mutagenesis was  
759 used for the mutation of the endogenous *clpP2* gene to obtain the *clpP2* conditional mutant  
760 *clpP2CM*.

761 **Figure 3–figure supplement 2. Clp protease degrades CarD under the starvation condition.**  
762 **A and B,** the starvation experiments on control and *clpP2CM* cells, respectively. The cells used for  
763 starvation were harvested at the exponential phase (three hours before the stationary phase). **C and**  
764 **D,** protein levels of ClpP1 and ClpP2, respectively, at different time points in *M. smegmatis* cells.  
765 For all panels, the number on each band of the Western blot results represent their relative  
766 quantitative values.

767 **Figure 4—figure supplement 1. RT-PCR analysis of the transcriptional levels of *ascarD* and**  
768 ***carD*.** **A**, schematic diagram of the strand-specific RT-PCR. Step (1) represents transcription of the  
769 *ascarD* and *carD* genes; step (2) represents *ascarD* and *carD* transcripts reverse transcribed into  
770 the corresponding cDNAs with RT-*ascarD*-R/RT-*carD*-R primers (Supplementary File 3); step (3)  
771 represents amplification of *AscarD* and *carD* cDNA with RT-*ascarD*-F/R or RT-*carD*-F/R primer  
772 pairs (Supplementary File 3), respectively. **B**, the RT-PCR results at different growth phases. Lane  
773 1 is the DL2000 ladder marker, lanes 2 and 3 show the *ascarD* RNA levels at MEP and MSP,  
774 respectively; lanes 4 and 5 show *carD* RNA levels at MEP and MSP, respectively; lanes 6 and 7  
775 show the RNA levels of internal reference gene *sigA* at MEP and MSP, respectively. **C**, *ascarD*  
776 RNA levels throughout the growth phase as measured by RT-PCR; *sigA* was used as an internal  
777 reference gene. The number on each band of the RT-PCR results represent their relative  
778 quantitative values, which are normalized with respect to their corresponding loading controls.

779 **Figure 5—figure supplement 1. The expression levels of *carD* and *ascarD* in different strains.**  
780 **A**, Schematic diagram for the location of sgRNA targeting *ascarD*. **B**, Transcript levels of *ascarD*,  
781 *carD*, and *ispD* in *ascarD*<sub>KD</sub> and control strains. The mc<sup>2</sup>155 strain transformed with pRH2521  
782 empty vector was used as the control. **C**, transcript levels of *ascarD* and *carD* in *ascarD*<sub>OE</sub> and  
783 control strains. The mc<sup>2</sup>155 strain transformed with pMV261 empty vector was used as the control.  
784 *sigA* was used as the internal reference gene of qRT-PCR. Error bars indicate the standard deviation  
785 of three biological replicates. Statistical testing was done using the Student's t-test, with \*\*\*  
786 indicating p-value <0.001, n.s. indicating p-value >0.05.

787 **Figure 7—figure supplement 1. Alignment of mycobacterial *carD* promoter sequences.** The  
788 100 bp promoter sequences of *carD* from 91 different mycobacteria were aligned by Clustal W,  
789 and the highly conserved nucleotides were marked in blue.

790

## 791 **Supplementary File**

792 **Supplementary File 1** The top 20 up-regulated genes in the CarD<sup>K125A</sup> mutant

793 **Supplementary File 2** Strains used in this study

794 **Supplementary File 3** Oligonucleotides used in this study

795

796

## 797 **References**

- 798 Abel, S., Chien, P., Wassmann, P., Schirmer, T., Kaefer, V., Laub, M.T., Baker, T.A., and Jenal, U. 2011.  
799 Regulatory cohesion of cell cycle and cell differentiation through interlinked phosphorylation and  
800 second messenger networks. *Molecular Cell* 43, 550-560. DOI:  
801 <https://doi.org/10.1016/j.molcel.2011.07.018>, PMID: 21855795
- 802 Akopian, T., Kandrór, O., Raju, R.M., Unnikrishnan, M., Rubin, E.J., and Goldberg, A.L. 2012. The active  
803 ClpP protease from *M. tuberculosis* is a complex composed of a heptameric ClpP1 and a ClpP2 ring.  
804 *EMBO Journal* 31, 1529-1541. DOI: <https://doi.org/10.1038/emboj.2012.5>, PMID: 22286948
- 805 Ali, M.K., Li, X., Tang, Q., Liu, X., Chen, F., Xiao, J., Ali, M., Chou, S.H., and He, J. 2017. Regulation of  
806 inducible potassium transporter KdpFABC by the KdpD/KdpE two-component system in  
807 *Mycobacterium smegmatis*. *Frontiers in Microbiology* 8, 570. DOI:  
808 <https://doi.org/10.3389/fmicb.2017.00570>, PMID: 28484428
- 809 Bae, B., Chen, J., Davis, E., Leon, K., Darst, S.A., and Campbell, E.A. 2015. CarD uses a minor groove  
810 wedge mechanism to stabilize the RNA polymerase open promoter complex. *eLife* 4, e08505. DOI:  
811 <https://doi.org/10.7554/eLife.08505>, PMID: 26349034
- 812 Chaussee, M.A., Dmitriev, A.V., Callegari, E.A., and Chaussee, M.S. 2008. Growth phase-associated  
813 changes in the transcriptome and proteome of *Streptococcus pyogenes*. *Archives of Microbiology* 189,  
814 27-41. DOI: <https://doi.org/10.1007/s00203-007-0290-1>, PMID: 17665172
- 815 China, A., Mishra, S., Tare, P., and Nagaraja, V. 2012. Inhibition of *Mycobacterium tuberculosis* RNA  
816 polymerase by binding of a Gre factor homolog to the secondary channel. *Journal of Bacteriology* 194,  
817 1009-1017. DOI: <https://doi.org/10.1128/jb.06128-11>, PMID: 22194445
- 818 Cohen, D.P., Renes, J., Bouwman, F.G., Zoetendal, E.G., Mariman, E., de Vos, W.M., and Vaughan, E.E.  
819 2006. Proteomic analysis of log to stationary growth phase *Lactobacillus plantarum* cells and a 2-DE  
820 database. *Proteomics* 6, 6485-6493. DOI: <https://doi.org/10.1002/pmic.200600361>, PMID: 17115453
- 821 Cortes, T., Schubert, O.T., Rose, G., Arnvig, K.B., Comas, I., Aebersold, R., and Young, D.B. 2013.  
822 Genome-wide mapping of transcriptional start sites defines an extensive leaderless transcriptome in  
823 *Mycobacterium tuberculosis*. *Cell Reports* 5, 1121-1131. DOI:  
824 <https://doi.org/10.1016/j.celrep.2013.10.031>, PMID: 24268774
- 825 Davis, E., Chen, J., Leon, K., Darst, S.A., and Campbell, E.A. 2015. Mycobacterial RNA polymerase forms  
826 unstable open promoter complexes that are stabilized by CarD. *Nucleic Acids Research* 43, 433-445.  
827 DOI: <https://doi.org/10.1093/nar/gku1231>, PMID: 25510492
- 828 Enany, S., Ato, M., and Matsumoto, S. 2021. Differential protein expression in exponential and stationary  
829 growth phases of *Mycobacterium avium* subsp. hominissuis 104. *Molecules* 26, 305. DOI:  
830 <https://doi.org/10.3390/molecules26020305>, PMID: 33435591
- 831 Fujihara, A., Tomatsu, H., Inagaki, S., Tadaki, T., Ushida, C., Himeno, H., and Muto, A. 2002. Detection  
832 of tmRNA-mediated *trans*-translation products in *Bacillus subtilis*. *Genes to Cells* 7, 343-350. DOI:  
833 <https://doi.org/10.1046/j.1365-2443.2002.00523.x>, PMID: 11918677

- 834 Gallego-Garcia, A., Iniesta, A.A., Gonzalez, D., Collier, J., Padmanabhan, S., and Elias-Arnanz, M. 2017.  
835 *Caulobacter crescentus* CdnL is a non-essential RNA polymerase-binding protein whose depletion  
836 impairs normal growth and rRNA transcription. *Scientific Reports* 7, 43240. DOI:  
837 <https://doi.org/10.1038/srep43240>, PMID: 28233804
- 838 Garner, A.L., Rammohan, J., Huynh, J.P., Onder, L.M., Chen, J., Bae, B., Jensen, D., Weiss, L.A., Manzano,  
839 A.R., Darst, S.A., *et al.* 2017. Effects of increasing the affinity of CarD for RNA Polymerase on  
840 *Mycobacterium tuberculosis* Growth, rRNA transcription, and virulence. *Journal of Bacteriology* 199,  
841 e00698-16. DOI: <https://doi.org/10.1128/jb.00698-16>, PMID: 27920294
- 842 Garner, A.L., Weiss, L.A., Manzano, A.R., Galburt, E.A., and Stallings, C.L. 2014. CarD integrates three  
843 functional modules to promote efficient transcription, antibiotic tolerance, and pathogenesis in  
844 mycobacteria. *Molecular Microbiology* 93, 682-697. DOI: <https://doi.org/10.1111/mmi.12681>, PMID:  
845 24962732
- 846 Gengenbacher, M., and Kaufmann, S.H. 2012. *Mycobacterium tuberculosis*: success through dormancy.  
847 *FEMS Microbiology Reviews* 36, 514-532. DOI: <https://doi.org/10.1111/j.1574-6976.2012.00331.x>,  
848 PMID: 22320122
- 849 Georg, J., and Hess, W.R. 2011. *cis*-antisense RNA, another level of gene regulation in bacteria.  
850 *Microbiology and Molecular Biology Reviews* : MMBR 75, 286-300. DOI:  
851 <https://doi.org/10.1128/MMBR.00032-10>, PMID: 21646430
- 852 Georg, J., and Hess, W.R. 2018. Widespread antisense transcription in prokaryotes. *Microbiology Spectrum*.  
853 6, RWR-0029-2018. DOI: <https://doi.org/10.1128/microbiolspec.RWR-0029-2018>, PMID: 30003872
- 854 Gottesman, S., Roche, E., Zhou, Y., and Sauer, R.T. 1998. The ClpXP and ClpAP proteases degrade proteins  
855 with carboxy-terminal peptide tails added by the SsrA-tagging system. *Genes & Development* 12, 1338-  
856 1347. DOI: <https://doi.org/10.1101/gad.12.9.1338>, PMID: 9573050
- 857 Gourse, R.L., Chen, A.Y., Gopalkrishnan, S., Sanchez-Vazquez, P., Myers, A., and Ross, W. 2018.  
858 Transcriptional responses to ppGpp and DksA. *Annual Review of Microbiology* 72, 163-184. DOI:  
859 <https://doi.org/10.1146/annurev-micro-090817-062444>, PMID: 30200857
- 860 Gourse, R.L., Gaal, T., Bartlett, M.S., Appleman, J.A., and Ross, W. 1996. rRNA transcription and growth  
861 rate-dependent regulation of ribosome synthesis in *Escherichia coli*. *Annual Review of Microbiology*  
862 50, 645-677. DOI: <https://doi.org/10.1146/annurev.micro.50.1.645>, PMID: 8905094
- 863 Hartkoorn, R.C., Sala, C., Uplekar, S., Busso, P., Rougemont, J., and Cole, S.T. 2012. Genome-wide  
864 definition of the SigF regulon in *Mycobacterium tuberculosis*. *Journal of Bacteriology* 194, 2001-2009.  
865 DOI: <https://doi.org/10.1128/JB.06692-11>, PMID: 22307756
- 866 Hauryliuk, V., Atkinson, G.C., Murakami, K.S., Tenson, T., and Gerdes, K. 2015. Recent functional insights  
867 into the role of (p)ppGpp in bacterial physiology. *Nature Reviews Microbiology* 13, 298-309. DOI:  
868 <https://doi.org/10.1038/nrmicro3448>, PMID: 25853779
- 869 Henry, K.K., Ross, W., and Gourse, R.L. 2021. *Rhodobacter sphaeroides* CarD negatively regulates its own  
870 promoter. *Journal of Bacteriology* 203, e0021021. DOI: <https://doi.org/10.1128/JB.00210-21>, PMID:

- 871 34152199
- 872 Henry, K.K., Ross, W., Myers, K.S., Lemmer, K.C., Vera, J.M., Landick, R., Donohue, T.J., and Gourse,  
873 R.L. 2020. A majority of *Rhodobacter sphaeroides* promoters lack a crucial RNA polymerase  
874 recognition feature, enabling coordinated transcription activation. *Proceedings of the National Academy*  
875 *of Sciences of the United States of America* *117*, 29658-29668. DOI:  
876 <https://doi.org/10.1073/pnas.2010087117>, PMID: 33168725
- 877 Hnasko, T.S., and Hnasko, R.M. (2015). The Western blot. In *ELISA* (Springer), pp. 87-96
- 878 Hoskins, J.R., and Wickner, S. (2006). Two peptide sequences can function cooperatively to facilitate  
879 binding and unfolding by ClpA and degradation by ClpAP. *Proceedings of the National Academy of*  
880 *Sciences of the United States of America* *103*, 909-914. DOI: <https://doi.org/10.1073/pnas.0509154103>,  
881 PMID: 16410355
- 882 Hubin, E.A., Fay, A., Xu, C., Bean, J.M., Saecker, R.M., Glickman, M.S., Darst, S.A., and Campbell, E.A.  
883 2017. Structure and function of the mycobacterial transcription initiation complex with the essential  
884 regulator RbpA. *eLife* *6*, e22520. DOI: <https://doi.org/10.7554/eLife.22520>, PMID: 28067618
- 885 Humpel, A., Gebhard, S., Cook, G.M., and Berney, M. 2010. The SigF regulon in *Mycobacterium*  
886 *smegmatis* reveals roles in adaptation to stationary phase, heat, and oxidative stress. *Journal of*  
887 *Bacteriology* *192*, 2491-2502. DOI: <https://doi.org/10.1128/JB.00035-10>, PMID: 20233930
- 888 Hurst-Hess, K., Biswas, R., Yang, Y., Rudra, P., Lasek-Nesselquist, E., and Ghosh, P. 2019. Mycobacterial  
889 SigA and SigB cotranscribe essential housekeeping genes during exponential growth. *mBio* *10*, e00273-  
890 19. DOI: <https://doi.org/10.1128/mBio.00273-19>, PMID: 31113892
- 891 Irving, S.E., and Corrigan, R.M. 2018. Triggering the stringent response: signals responsible for activating  
892 (p)ppGpp synthesis in bacteria. *Microbiology-SGM* *164*, 268-276. DOI:  
893 <https://doi.org/10.1099/mic.0.000621>, PMID: 29493495
- 894 Jensen, D., Manzano, A.R., Rammohan, J., Stallings, C.L., and Galburt, E.A. 2019. CarD and RbpA modify  
895 the kinetics of initial transcription and slow promoter escape of the *Mycobacterium tuberculosis* RNA  
896 polymerase. *Nucleic Acids Research* *47*, 6685-6698. DOI: <https://doi.org/10.1093/nar/gkz449>, PMID:  
897 31127308
- 898 Johnson, G.E., Lalanne, J.B., Peters, M.L., and Li, G.W. 2020. Functionally uncoupled transcription-  
899 translation in *Bacillus subtilis*. *Nature* *585*, 124-128. DOI: <https://doi.org/10.1038/s41586-020-2638-5>,  
900 PMID: 32848247
- 901 Kirstein, J., Moliere, N., Dougan, D.A., and Turgay, K. 2009. Adapting the machine: adaptor proteins for  
902 Hsp100/Clp and AAA+ proteases. *Nature Reviews Microbiology* *7*, 589-599. DOI:  
903 <https://doi.org/10.1038/nrmicro2185>, PMID: 19609260
- 904 Kriel, A., Bittner, A.N., Kim, S.H., Liu, K., Tehranchi, A.K., Zou, W.Y., Rendon, S., Chen, R., Tu, B.P.,  
905 and Wang, J.D. 2012. Direct regulation of GTP homeostasis by (p)ppGpp: a critical component of  
906 viability and stress resistance. *Molecular Cell* *48*, 231-241. DOI:  
907 <https://doi.org/10.1016/j.molcel.2012.08.009>, PMID: 22981860



- 908 Laakso, K., Koskenniemi, K., Koponen, J., Kankainen, M., Surakka, A., Salusjarvi, T., Auvinen, P.,  
909 Savijoki, K., Nyman, T.A., Kalkkinen, N., *et al.* 2011. Growth phase-associated changes in the proteome  
910 and transcriptome of *Lactobacillus rhamnosus* GG in industrial-type whey medium. *Microbial*  
911 *Biotechnology* 4, 746-766. DOI: <https://doi.org/10.1111/j.1751-7915.2011.00275.x>, PMID: 21883975
- 912 LaBreck, C.J., May, S., Viola, M.G., Conti, J., and Camberg, J.L. 2017. The protein chaperone ClpX targets  
913 native and non-native aggregated substrates for remodeling, disassembly, and degradation with ClpP.  
914 *Frontiers in Molecular Biosciences* 4, 26. DOI: <https://doi.org/10.3389/fmolb.2017.00026>, PMID:  
915 28523271
- 916 Li, M., Kandrór, O., Akopian, T., Dharkar, P., Wlodawer, A., Maurizi, M.R., and Goldberg, A.L. 2016.  
917 Structure and functional properties of the active form of the proteolytic complex, ClpP1P2, from  
918 *Mycobacterium tuberculosis*. *The Journal of Biological Chemistry* 291, 7465-7476. DOI:  
919 <https://doi.org/10.1074/jbc.M115.700344>, PMID: 26858247
- 920 Li, X., Mei, H., Chen, F., Tang, Q., Yu, Z., Cao, X., Andongma, B.T., Chou, S.H., and He, J. 2017.  
921 Transcriptome landscape of *Mycobacterium smegmatis*. *Frontiers in Microbiology* 8, 2505. DOI:  
922 <https://doi.org/10.3389/fmicb.2017.02505>, PMID: 29326668
- 923 Livak, K.J., and Schmittgen, T.D. 2001. Analysis of relative gene expression data using real-time  
924 quantitative PCR and the  $2^{-\Delta\Delta CT}$  method. *Methods* 25, 402-408. DOI:  
925 <https://doi.org/10.1006/meth.2001.1262>, PMID: 11846609
- 926 Lunge, A., Gupta, R., Choudhary, E., and Agarwal, N. 2020. The unfoldase ClpC1 of *Mycobacterium*  
927 *tuberculosis* regulates the expression of a distinct subset of proteins having intrinsically disordered  
928 termini. *Journal of Biological Chemistry* 295, 9455-9473. DOI:  
929 <https://doi.org/10.1074/jbc.RA120.013456>, PMID: 32409584
- 930 Michel, A., Agerer, F., Hauck, C.R., Herrmann, M., Ullrich, J., Hacker, J., and Ohlsen, K. 2006. Global  
931 regulatory impact of ClpP protease of *Staphylococcus aureus* on regulons involved in virulence,  
932 oxidative stress response, autolysis, and DNA repair. *Journal of Bacteriology* 188, 5783-5796. DOI:  
933 <https://doi.org/10.1128/JB.00074-06>, PMID: 16885446
- 934 Moreno-Cinos, C., Goossens, K., Salado, I.G., Van Der Veken, P., De Winter, H., and Augustyns, K. 2019.  
935 ClpP protease, a promising antimicrobial target. *International Journal of Molecular Sciences* 20. DOI:  
936 <https://doi.org/10.3390/ijms20092232>, PMID: 31067645
- 937 Morita, R.Y. (1982). Starvation-survival of heterotrophs in the marine environment. In *Advances in*  
938 *microbial ecology* (Springer), pp. 171-198
- 939 Paul, B.J., Ross, W., Gaal, T., and Gourse, R.L. 2004. rRNA transcription in *Escherichia coli*. *Annual*  
940 *Review of Genetics* 38, 749-770. DOI: <https://doi.org/10.1146/annurev.genet.38.072902.091347>, PMID:  
941 15568992
- 942 Prusa, J., Zhu, D.X., and Stallings, C.L. 2018. The stringent response and *Mycobacterium tuberculosis*  
943 pathogenesis. *Pathog Dis* 76. DOI: <https://doi.org/10.1093/femspd/fty054>, PMID: 29947752
- 944 Raju, R.M., Goldberg, A.L., and Rubin, E.J. 2012. Bacterial proteolytic complexes as therapeutic targets.

- 945 Nature Reviews Drug Discovery *11*, 777-789. DOI: <https://doi.org/10.1038/nrd3846>, PMID: 23023677
- 946 Raju, R.M., Jedrychowski, M.P., Wei, J.R., Pinkham, J.T., Park, A.S., O'Brien, K., Rehren, G.,  
947 Schnappinger, D., Gygi, S.P., and Rubin, E.J. 2014. Post-translational regulation via Clp protease is  
948 critical for survival of *Mycobacterium tuberculosis*. PLoS Pathogens *10*, e1003994. DOI:  
949 <https://doi.org/10.1371/journal.ppat.1003994>, PMID: 24603869
- 950 Rammohan, J., Ruiz Manzano, A., Garner, A.L., Prusa, J., Stallings, C.L., and Galburt, E.A. 2016.  
951 Cooperative stabilization of *Mycobacterium tuberculosis* rrnAP3 promoter open complexes by RbpA  
952 and CarD. Nucleic Acids Research *44*, 7304-7313. DOI: <https://doi.org/10.1093/nar/gkw577>, PMID:  
953 27342278
- 954 Rammohan, J., Ruiz Manzano, A., Garner, A.L., Stallings, C.L., and Galburt, E.A. 2015. CarD stabilizes  
955 mycobacterial open complexes via a two-tiered kinetic mechanism. Nucleic Acids Research *43*, 3272-  
956 3285. DOI: <https://doi.org/10.1093/nar/gkv078>, PMID: 25697505
- 957 Rasouly, A., Pani, B., and Nudler, E. 2017. A magic spot in genome maintenance. Trends in Genetics *33*,  
958 58-67. DOI: <https://doi.org/10.1016/j.tig.2016.11.002>, PMID: 27931778
- 959 Saberi, F., Kamali, M., Najafi, A., Yazdanparast, A., and Moghaddam, M.M. 2016. Natural antisense RNAs  
960 as mRNA regulatory elements in bacteria: a review on function and applications. Cellular & Molecular  
961 Biology Letters *21*, 6. DOI: <https://doi.org/10.1186/s11658-016-0007-z>, PMID: 28536609
- 962 Schmitz, K.R., and Sauer, R.T. 2014. Substrate delivery by the AAA+ ClpX and ClpC1 unfoldases activates  
963 the mycobacterial ClpP1P2 peptidase. Molecular Microbiology *93*, 617-628. DOI:  
964 <https://doi.org/10.1111/mmi.12694>, PMID: 24976069
- 965 Schultz, D., Schluter, R., Gerth, U., and Lalk, M. 2017. Metabolic perturbations in a *Bacillus subtilis* clpP  
966 mutant during glucose starvation. Metabolites *7*. DOI: <https://doi.org/10.3390/metabo7040063>, PMID:  
967 29186773
- 968 Sesto, N., Wurtzel, O., Archambaud, C., Sorek, R., and Cossart, P. 2013. The excludon: a new concept in  
969 bacterial antisense RNA-mediated gene regulation. Nature Reviews Microbiology *11*, 75-82. DOI:  
970 <https://doi.org/10.1038/nrmicro2934>, PMID: 23268228
- 971 Singh, A.K., Carette, X., Potluri, L.P., Sharp, J.D., Xu, R., Pristic, S., and Husson, R.N. 2016. Investigating  
972 essential gene function in *Mycobacterium tuberculosis* using an efficient CRISPR interference system.  
973 Nucleic Acids Research *44*, e143. DOI: <https://doi.org/10.1093/nar/gkw625>, PMID: 27407107
- 974 Smeulders, M.J., Keer, J., Speight, R.A., and Williams, H.D. 1999. Adaptation of *Mycobacterium*  
975 *smegmatis* to stationary phase. Journal of Bacteriology *181*, 270-283. DOI, PMID: 9864340
- 976 Sowell, S.M., Norbeck, A.D., Lipton, M.S., Nicora, C.D., Callister, S.J., Smith, R.D., Barofsky, D.F., and  
977 Giovannoni, S.J. 2008. Proteomic analysis of stationary phase in the marine bacterium "Candidatus  
978 Pelagibacter ubique". Applied and Environmental Microbiology *74*, 4091-4100. DOI:  
979 <https://doi.org/10.1128/AEM.00599-08>, PMID: 18469119
- 980 Srivastava, D.B., Leon, K., Osmundson, J., Garner, A.L., Weiss, L.A., Westblade, L.F., Glickman, M.S.,  
981 Landick, R., Darst, S.A., Stallings, C.L., *et al.* 2013. Structure and function of CarD, an essential



- 982 mycobacterial transcription factor. Proceedings of the National Academy of Sciences of the United  
983 States of America *110*, 12619-12624. DOI: <https://doi.org/10.1073/pnas.1308270110>, PMID: 23858468
- 984 Srivatsan, A., and Wang, J.D. 2008. Control of bacterial transcription, translation and replication by  
985 (p)ppGpp. Current Opinion in Microbiology *11*, 100-105. DOI:  
986 <https://doi.org/10.1016/j.mib.2008.02.001>, PMID: 18359660
- 987 Stallings, C.L., Stephanou, N.C., Chu, L., Hochschild, A., Nickels, B.E., and Glickman, M.S. 2009. CarD  
988 is an essential regulator of rRNA transcription required for *Mycobacterium tuberculosis* persistence.  
989 Cell *138*, 146-159. DOI: <https://doi.org/10.1016/j.cell.2009.04.041>, PMID: 19596241
- 990 Sudalaiyadum Perumal, A., Vishwakarma, R.K., Hu, Y., Morichaud, Z., and Brodolin, K. 2018. RbpA  
991 relaxes promoter selectivity of *M. tuberculosis* RNA polymerase. Nucleic Acids Research *46*, 10106-  
992 10118. DOI: <https://doi.org/10.1093/nar/gky714>, PMID: 30102406
- 993 Tang, Q., Li, X., Zou, T., Zhang, H., Wang, Y., Gao, R., Li, Z., He, J., and Feng, Y. 2014. *Mycobacterium*  
994 *smegmatis* BioQ defines a new regulatory network for biotin metabolism. Molecular Microbiology. DOI:  
995 <https://doi.org/10.1111/mmi.12817>, PMID: 25287944
- 996 Tare, P., Mallick, B., and Nagaraja, V. 2013. Co-evolution of specific amino acid in sigma 1.2 region and  
997 nucleotide base in the discriminator to act as sensors of small molecule effectors of transcription  
998 initiation in mycobacteria. Molecular Microbiology *90*, 569-583. DOI:  
999 <https://doi.org/10.1111/mmi.12384>, PMID: 23998628
- 1000 Tojo, S., Kumamoto, K., Hirooka, K., and Fujita, Y. 2010. Heavy involvement of stringent transcription  
1001 control depending on the adenine or guanine species of the transcription initiation site in glucose and  
1002 pyruvate metabolism in *Bacillus subtilis*. Journal of Bacteriology *192*, 1573-1585. DOI:  
1003 <https://doi.org/10.1128/JB.01394-09>, PMID: 20081037
- 1004 Trentini, D.B., Suskiewicz, M.J., Heuck, A., Kurzbauer, R., Deszcz, L., Mechtler, K., and Clausen, T. 2016.  
1005 Arginine phosphorylation marks proteins for degradation by a Clp protease. Nature *539*, 48-53. DOI:  
1006 <https://doi.org/10.1038/nature20122>, PMID: 27749819
- 1007 Voskuil, M.I., Schnappinger, D., Visconti, K.C., Harrell, M.I., Dolganov, G.M., Sherman, D.R., and  
1008 Schoolnik, G.K. 2003. Inhibition of respiration by nitric oxide induces a *Mycobacterium tuberculosis*  
1009 dormancy program. Journal of Experimental Medicine *198*, 705-713. DOI:  
1010 <https://doi.org/10.1084/jem.20030205>, PMID: 12953092
- 1011 Wayne, L.G., and Hayes, L.G. 1996. An in vitro model for sequential study of shutdown of *Mycobacterium*  
1012 *tuberculosis* through two stages of nonreplicating persistence. Infection and Immunity *64*, 2062-2069.  
1013 DOI: <https://doi.org/10.1128/IAI.64.6.2062-2069.1996>, PMID: 8675308
- 1014 Weiss, L.A., Harrison, P.G., Nickels, B.E., Glickman, M.S., Campbell, E.A., Darst, S.A., and Stallings, C.L.  
1015 2012. Interaction of CarD with RNA polymerase mediates *Mycobacterium tuberculosis* viability,  
1016 rifampin resistance, and pathogenesis. Journal of Bacteriology *194*, 5621-5631. DOI:  
1017 <https://doi.org/10.1128/jb.00879-12>, PMID: 22904282
- 1018 Weiss, L.A., and Stallings, C.L. 2013. Essential roles for *Mycobacterium tuberculosis* Rel beyond the

- 1019 production of (p)ppGpp. *Journal of Bacteriology* *195*, 5629-5638. DOI:  
1020 <https://doi.org/10.1128/JB.00759-13>, PMID: 24123821
- 1021 Yan, M.Y., Yan, H.Q., Ren, G.X., Zhao, J.P., Guo, X.P., and Sun, Y.C. 2017. CRISPR-Cas12a-assisted  
1022 recombineering in Bacteria. *Applied and Environmental Microbiology* *83*, e00947-17. DOI:  
1023 <https://doi.org/10.1128/AEM.00947-17>, PMID: 28646112
- 1024 Yang, F., Lei, Y., Zhou, M., Yao, Q., Han, Y., Wu, X., Zhong, W., Zhu, C., Xu, W., Tao, R., *et al.* 2018.  
1025 Development and application of a recombination-based library versus library high- throughput yeast  
1026 two-hybrid (RLL-Y2H) screening system. *Nucleic Acids Research* *46*, e17. DOI:  
1027 <https://doi.org/10.1093/nar/gkx1173>, PMID: 29165646
- 1028 Yang, M., Gao, C., Cui, T., An, J., and He, Z.G. 2012. A TetR-like regulator broadly affects the expressions  
1029 of diverse genes in *Mycobacterium smegmatis*. *Nucleic Acids Research* *40*, 1009-1020. DOI:  
1030 <https://doi.org/10.1093/nar/gkr830>, PMID: 21976733
- 1031 Zaunbrecher, M.A., Sikes, R.D., Metchock, B., Shinnick, T.M., and Posey, J.E. 2009. Overexpression of  
1032 the chromosomally encoded aminoglycoside acetyltransferase eis confers kanamycin resistance in  
1033 *Mycobacterium tuberculosis*. *Proceedings of the National Academy of Sciences of the United States of*  
1034 *America* *106*, 20004-20009. DOI, PMID: WOS:000272180900049
- 1035 Zhu, D.X., Garner, A.L., Galburt, E.A., and Stallings, C.L. 2019. CarD contributes to diverse gene  
1036 expression outcomes throughout the genome of *Mycobacterium tuberculosis*. *Proceedings of the*  
1037 *National Academy of Sciences of the United States of America* *116*, 13573-13581. DOI:  
1038 <https://doi.org/10.1073/pnas.1900176116>, PMID: 31217290
